# Supplementary material
Source: publisher figshare collection journal article supplement (https://gsapubs.figshare.com/articles/dataset/_/23460875)
Supplement: Supplementary file 1 [file 41168717]

Wang, B., Zhou, J.B., Ding, Z.J., Wilde, S.A., Song, M.C., Zhao, T.Q., and Bao, Z.Y., 2023, Late Mesozoic magmatism and gold metallogeny of the Jiaodong Peninsula, China: A response to the destruction of the North China Craton: GSA Bulletin, <https://doi.org/10.1130/B37057.1>.

## Supplemental Material

**Text S1.** Analytical Methods.

**Table S1.** Zircon LA–ICP–MS U–Pb data of the Linglong and Weideshan suites in the Jiaodong Peninsula, China.

**Table S2.** Results of Hf isotope analysis and model age calculation of zircon by LA-ICP-MS.

**Table S3.** Whole-rock major and trace element data for the Linglong and Weideshan suites in the Jiaodong Peninsula, China.

**Table S4.** Sr-Nd-Pb isotope data for the Linglong and Weideshan suites in the Jiaodong Peninsula, China.

**Table S5.** Previous published intrusion ages of three major generations of granitoids (Linglong, Guojialing and Weideshan) in the Jiaodong Peninsula<sup>a</sup>.

## Supplemental Text S1. ANALYTICAL METHODS

### 1. Zircon LA-ICP-MS U-Pb isotopic dating

Separation and cathodoluminescence (CL) images of zircon from Mesozoic granitoids were carried out by the Chengxin geological Testing Co. Ltd., Langfang, China. Zircon U–Pb dating and trace element analyses of zircons was conducted by LA–ICP–MS at the Guangzhou Tuoyan Analytical Technology Co., Ltd., Guangzhou, China. Laser sampling was performed using a NWR 193 laser ablation system. An iCAP RQ ICP–MS instrument was used to acquire ion–signal intensities. Helium was applied as a carrier gas and argon was used as the make–up gas and mixed with the carrier gas via a Y–connector before entering the MS. The spot size and frequency of the laser were set to 30  $\mu\text{m}$  and 6 Hz, respectively, in this study. The energy was 3.5 J/cm<sup>2</sup>. Zircon 91,500 (Reed, 1992) and glass NIST610 (Hinton and Upton, 1991) were used as external standards for U–Pb dating and trace element calibration, respectively. Each analysis incorporated a background acquisition of approximately 30 s followed by 40 s of data acquisition from the sample. An Excel–based software ICPMSDataCal was used to perform off–line selection and integration of background and analyzed signals, time–drift correction and quantitative calibration for U–Pb dating and trace element analysis. <sup>206</sup>Pb/<sup>238</sup>U and <sup>207</sup>Pb/<sup>206</sup>Pb ages were used to calculate the crystallization ages of the <1,000 Ma and >1,000 Ma zircon grains, respectively. Typical CL images are presented in Fig. 3, together with the U–Pb ages for the corresponding spots. The results for isotopic ratios and calculated ages are listed in Supplementary Table S1.

### 2. *In situ* Hf isotope ratio analysis

Zircon *in situ* Hf isotopic analyses were conducted at the Guangzhou Tuoyan Analytical Technology Co., Ltd., using a Neptune Laser Ablation Multiple–Receiver LA–ICP–MS with a 193

nm laser sampling system. The laser spot diameter was 60  $\mu\text{m}$ , the pulse width was 15 ns, and the abrasion material carrier gas was He. Details of the analytical procedures are available in [Wu et al. \(2006\)](#) and [Xie et al. \(2008\)](#). Measurements of the 91500 and MT zircons were conducted after every ten analyses. The standard samples 91500 and MT had  $^{176}\text{Hf}/^{177}\text{Hf}$  ratios of  $0.282316 \pm 30$  and  $0.282507 \pm 50$ , respectively. In the  $\varepsilon_{\text{Hf}}(t)$  and model age calculations, the  $^{176}\text{Lu}$  decay constant used  $1.867^{-11}$  ([Bouvier et al., 2008](#)), and the  $^{176}\text{Lu}/^{177}\text{Hf}$  and  $^{176}\text{Hf}/^{177}\text{Hf}$  ratios of the present-day chondritic and depleted mantle were 0.0332 and 0.282772 ([Blichert-Toft et al., 1997](#)), and 0.0384 and 0.28325, respectively ([Griffin et al., 2000](#)). The calculation of the crustal model ages determined an average crustal value of  $^{176}\text{Lu}/^{177}\text{Hf} = 0.015$  ([Griffin et al., 2001](#)). The results are listed in [Supplementary Table S2](#).

### 3. Whole-rock major and trace element analysis

A total of twenty-four fresh samples of the Linglong (12) and Weideshan (12) granitoids were selected for major, trace, and rare earth element (REE) analyses. Whole-rock samples were crushed to approximately 200 mesh in an agate mill. The analyses were performed at the Guangzhou Tuoyan Analytical Technology Co., Ltd., Guangzhou, China. The major element analyses utilized a Philips PW2404 type X-ray fluorescence spectrometer, which has an analytical precision of better than 5%. The trace element and REE concentrations were determined using an ICP-MS (Element XR). In general, the analytical results for standard rock indicated that the analytical precision was better than 5 % for major elements and 10 % for trace element and REE concentrations. The results of major and trace element analysis are listed in [Supplementary Table S3](#).

### 4. Whole-rock Sr-Nd-Pb analysis

Eight Sr–Nd–Pb isotopic analysis was carried out at the Guangzhou Tuoyan Analytical Technology Co., Ltd., Guangzhou, China. For Sr–Nd isotopic analysis, approximately 50 mg of whole–rock powder was dissolved in distilled HF–HNO<sub>3</sub> at 150 °C for five days. After complete dissolution, the samples were dried and dissolved in 2.5 NHCl. Strontium and neodymium were extracted by conventional ion exchange chromatographic techniques. The measured Sr and Nd isotopic ratios were normalized to  $^{86}\text{Sr}/^{88}\text{Sr} = 0.1194$  and  $^{146}\text{Nd}/^{144}\text{Nd} = 0.7219$ , respectively. The reproducibility of  $^{87}\text{Sr}/^{86}\text{Sr}$  and  $^{143}\text{Nd}/^{144}\text{Nd}$  during measurement was monitored by analysis of the standards NBS987 for Sr and Shin Etou for Nd, yielding average values of  $0.710243 \pm 14$  ( $2\sigma$ ) and  $0.512124 \pm 11$  ( $2\sigma$ ), respectively. The details of the analytical techniques are described by Liang et al. (2003).

For Pb isotope measurements, samples of about 100 mg were dissolved in Teflon bombs using an HF–HNO<sub>3</sub> mixture. The separation of Pb was done through chromatographic columns filled with anion exchange resin Eichrom PN A8–B500–F–CL (200–400 mesh), according to procedures involving HBr. The Pb solutions were dried on a hot plate and deposited in a single Re filament using a mixture of 3  $\mu\text{L}$  silica gel and 3  $\mu\text{L}$  H<sub>3</sub>PO<sub>4</sub> 0.25 N. The isotopic analyzes were carried out using a Thermo Fisher multi–collector mass spectrometer TRITON Plus–Thermal Ionization Mass Spectrometry (TIMS), using faraday collectors in static mode. The results of Sr–Nd–Pb analysis are listed in [Supplymentary Table S4](#).

## References

Blichert-Toft, J., and Albarède, F., 1997, The Lu–Hf isotope geochemistry of chondrites and the evolution of the mantle–crust system: *Earth and Planetary Science Letters*, v. 148, p. 243–258, [https://doi.org/10.1016/S0012-821X\(97\)00040-X](https://doi.org/10.1016/S0012-821X(97)00040-X).

- Bouvier, A., Vervoort, J.D., and Patchett, P.J., 2008, The Lu–Hf and Sm–Nd isotopic composition of CHUR: Constraints from unequilibrated chondrites and implications for the bulk composition of terrestrial planets: *Earth and Planetary Science Letters*, v. 273, p. 48–57, <https://doi.org/10.1016/j.epsl.2008.06.010>.
- Griffin, W.L., Pearson, N.J., Belousova, E., Jackson, S.E., Achterbergh, E.V., O'Reilly, S.Y., and Shee, S.R., 2000, The Hf isotope composition of cratonic mantle: LAM-MC-ICPMS analysis of zircon megacrysts in kimberlites: *Geochimica et Cosmochimica Acta*, v. 64, p. 133–147, [https://doi.org/10.1016/S0016-7037\(99\)00343-9](https://doi.org/10.1016/S0016-7037(99)00343-9).
- Griffin, W.L., Win, T.T., Davis, R., Wathanakul, P., Andrew, A., Metcalfe, I., and Cartigny, P., 2001, Diamonds from Myanmar and Thailand: Characteristics and possible origins: *Economic Geology*, v. 96, p. 159–170, <https://doi.org/10.2113/gsecongeo.96.1.0159>.
- Hinton, R.W., and Upton, B.G.J., 1991, The chemistry of zircon: Variations within and between large crystals from syenite and alkali basalt xenoliths: *Geochimica et Cosmochimica Acta*, v. 55, p. 3287–3302, [https://doi.org/10.1016/0016-7037\(91\)90489-R](https://doi.org/10.1016/0016-7037(91)90489-R).
- Liang, X.R., Wei, G.J., and Li, X.H., 2003, Accurate determination of  $^{143}\text{Nd}/^{144}\text{Nd}$  and Sm/Nd ratios by MC-ICPMS: *Geochemistry*, v. 32, no. 1, p. 91–96.
- Reed, W.P., 1992, Certificate of Analysis: Standard Reference Materials 610 and 611; National Institute of Standards and Technology.
- Wu, F.Y., Yang, Y.H., Xie, L.W., Yang, J.H., and Xu, P., 2006, Hf isotopic compositions of the standard zircons and baddeleyites used in U–Pb geochronology: *Chemical Geology*, v. 234, p. 105–126, <https://doi.org/10.1016/j.chemgeo.2006.05.003>.

Xie, L.W., Zhang, Y.B., Zhang, H.H., Sun, J.F., and Wu, F.Y., 2008, In situ, simultaneous determination of trace elements, U-Pb and Lu-Hf isotopes in zircon and baddeleyite: Chinese Science Bulletin, v. 53, p. 1565–1573, <https://doi.org/10.1007/s11434-008-0086-y>.

**Table S1. Zircon LA-ICP-MS U-Pb data of the Linglong and Weideshan suites in the Jiaodong Peninsula, China.**

| No.                                       | Content (ppm) |      | Th/U | Isotope ratio                        |        |                                     |        |                                     |        | Apparent age (Ma)                    |     |                                     |    |                                     |    |
|-------------------------------------------|---------------|------|------|--------------------------------------|--------|-------------------------------------|--------|-------------------------------------|--------|--------------------------------------|-----|-------------------------------------|----|-------------------------------------|----|
|                                           | Th            | U    |      | <sup>207</sup> Pb/ <sup>206</sup> Pb | 1σ     | <sup>207</sup> Pb/ <sup>235</sup> U | 1σ     | <sup>206</sup> Pb/ <sup>238</sup> U | 1σ     | <sup>207</sup> Pb/ <sup>206</sup> Pb | 1σ  | <sup>207</sup> Pb/ <sup>235</sup> U | 1σ | <sup>206</sup> Pb/ <sup>238</sup> U | 1σ |
| <b>Linglong suite</b>                     |               |      |      |                                      |        |                                     |        |                                     |        |                                      |     |                                     |    |                                     |    |
| <b>Linglong intrusion (sample 21JD41)</b> |               |      |      |                                      |        |                                     |        |                                     |        |                                      |     |                                     |    |                                     |    |
| 21JD41_1                                  | 11            | 327  | 0.03 | 0.0512                               | 0.0018 | 0.2527                              | 0.0085 | 0.0359                              | 0.0004 | 256                                  | 80  | 229                                 | 7  | 227                                 | 2  |
| 21JD41_2                                  | 49            | 473  | 0.10 | 0.0480                               | 0.0016 | 0.1647                              | 0.0053 | 0.0249                              | 0.0002 | 98                                   | 76  | 155                                 | 5  | 158                                 | 2  |
| 21JD41_3                                  | 24            | 368  | 0.06 | 0.0509                               | 0.0018 | 0.1720                              | 0.0060 | 0.0245                              | 0.0003 | 235                                  | 84  | 161                                 | 5  | 156                                 | 2  |
| 21JD41_4                                  | 3             | 8    | 0.38 | 0.0696                               | 0.0175 | 0.2680                              | 0.0140 | 0.0377                              | 0.0005 | 917                                  | 538 | 241                                 | 32 | 239                                 | 12 |
| 21JD41_5                                  | 51            | 435  | 0.12 | 0.0512                               | 0.0018 | 0.1708                              | 0.0062 | 0.0241                              | 0.0002 | 250                                  | 81  | 160                                 | 5  | 153                                 | 1  |
| 21JD41_6                                  | 75            | 193  | 0.39 | 0.0612                               | 0.0041 | 0.5632                              | 0.1167 | 0.0523                              | 0.0078 | 656                                  | 146 | 454                                 | 76 | 329                                 | 48 |
| 21JD41_7                                  | 50            | 370  | 0.13 | 0.0486                               | 0.0019 | 0.1626                              | 0.0060 | 0.0243                              | 0.0003 | 128                                  | 91  | 153                                 | 5  | 155                                 | 2  |
| 21JD41_8                                  | 16            | 125  | 0.13 | 0.0481                               | 0.0038 | 0.1477                              | 0.0110 | 0.0225                              | 0.0005 | 106                                  | 174 | 140                                 | 10 | 143                                 | 3  |
| 21JD41_9                                  | 31            | 266  | 0.12 | 0.0473                               | 0.0021 | 0.1599                              | 0.0070 | 0.0246                              | 0.0003 | 65                                   | 104 | 151                                 | 6  | 157                                 | 2  |
| 21JD41_10                                 | 28            | 646  | 0.04 | 0.0482                               | 0.0014 | 0.2420                              | 0.0073 | 0.0364                              | 0.0006 | 109                                  | 69  | 220                                 | 6  | 231                                 | 3  |
| 21JD41_11                                 | 8             | 278  | 0.03 | 0.0458                               | 0.0020 | 0.1576                              | 0.0072 | 0.0249                              | 0.0003 | 62                                   | 97  | 149                                 | 6  | 159                                 | 2  |
| 21JD41_12                                 | 11            | 874  | 0.01 | 0.0504                               | 0.0011 | 0.2391                              | 0.0052 | 0.0344                              | 0.0003 | 213                                  | 48  | 218                                 | 4  | 218                                 | 2  |
| 21JD41_13                                 | 327           | 1014 | 0.32 | 0.0504                               | 0.0012 | 0.1779                              | 0.0044 | 0.0256                              | 0.0002 | 213                                  | 83  | 166                                 | 4  | 163                                 | 1  |
| 21JD41_14                                 | 40            | 315  | 0.13 | 0.0484                               | 0.0020 | 0.1699                              | 0.0071 | 0.0255                              | 0.0003 | 120                                  | 98  | 159                                 | 6  | 162                                 | 2  |
| 21JD41_15                                 | 451           | 1075 | 0.42 | 0.0498                               | 0.0013 | 0.1791                              | 0.0048 | 0.0261                              | 0.0002 | 187                                  | 66  | 167                                 | 4  | 166                                 | 1  |
| 21JD41_16                                 | 4             | 319  | 0.01 | 0.0498                               | 0.0017 | 0.2239                              | 0.0073 | 0.0327                              | 0.0004 | 187                                  | 78  | 205                                 | 6  | 207                                 | 2  |
| 21JD41_17                                 | 170           | 445  | 0.38 | 0.0484                               | 0.0014 | 0.1762                              | 0.0056 | 0.0264                              | 0.0004 | 117                                  | 64  | 165                                 | 5  | 168                                 | 2  |
| 21JD41_18                                 | 16            | 56   | 0.29 | 0.2137                               | 0.0033 | 17.1231                             | 0.2525 | 0.5810                              | 0.0054 | 3000                                 | 25  | 2942                                | 14 | 2953                                | 22 |
| 21JD41_19                                 | 5             | 3    | 1.57 | 0.0649                               | 0.0263 | 0.2601                              | 0.0129 | 0.0357                              | 0.0005 | 772                                  | 679 | 259                                 | 57 | 226                                 | 16 |
| 21JD41_20                                 | 133           | 629  | 0.21 | 0.0497                               | 0.0015 | 0.1722                              | 0.0051 | 0.0251                              | 0.0003 | 189                                  | 67  | 161                                 | 4  | 160                                 | 2  |
| 21JD41_21                                 | 27            | 73   | 0.38 | 0.0486                               | 0.0034 | 0.2404                              | 0.0160 | 0.0360                              | 0.0004 | 128                                  | 156 | 219                                 | 13 | 228                                 | 3  |
| 21JD41_22                                 | 26            | 205  | 0.13 | 0.0491                               | 0.0037 | 0.1579                              | 0.0116 | 0.0235                              | 0.0004 | 154                                  | 170 | 149                                 | 10 | 150                                 | 3  |
| 21JD41_23                                 | 234           | 834  | 0.28 | 0.0489                               | 0.0011 | 0.1725                              | 0.0040 | 0.0255                              | 0.0002 | 146                                  | 49  | 162                                 | 4  | 162                                 | 1  |
| 21JD41_24                                 | 92            | 413  | 0.22 | 0.0513                               | 0.0023 | 0.1824                              | 0.0085 | 0.0257                              | 0.0003 | 254                                  | 102 | 170                                 | 7  | 163                                 | 2  |
| 21JD41_25                                 | 86            | 503  | 0.17 | 0.0495                               | 0.0016 | 0.1706                              | 0.0059 | 0.0249                              | 0.0002 | 172                                  | 78  | 160                                 | 5  | 159                                 | 1  |

| No.                                       | Content (ppm) |      | Th/U | Isotope ratio                     |            |                                  |            |                                  |            | Apparent age (Ma)                 |            |                                  |            |                                  |            |
|-------------------------------------------|---------------|------|------|-----------------------------------|------------|----------------------------------|------------|----------------------------------|------------|-----------------------------------|------------|----------------------------------|------------|----------------------------------|------------|
|                                           | Th            | U    |      | $^{207}\text{Pb}/^{206}\text{Pb}$ | 1 $\sigma$ | $^{207}\text{Pb}/^{235}\text{U}$ | 1 $\sigma$ | $^{206}\text{Pb}/^{238}\text{U}$ | 1 $\sigma$ | $^{207}\text{Pb}/^{206}\text{Pb}$ | 1 $\sigma$ | $^{207}\text{Pb}/^{235}\text{U}$ | 1 $\sigma$ | $^{206}\text{Pb}/^{238}\text{U}$ | 1 $\sigma$ |
| <b>Linglong intrusion (sample 21JD52)</b> |               |      |      |                                   |            |                                  |            |                                  |            |                                   |            |                                  |            |                                  |            |
| 21JD52_1                                  | 287           | 327  | 0.88 | 0.0506                            | 0.0018     | 0.1674                           | 0.0048     | 0.0252                           | 0.0004     | 224                               | 92         | 158                              | 5          | 155                              | 2          |
| 21JD52_2                                  | 18            | 27   | 0.67 | 0.0487                            | 0.0129     | 0.1622                           | 0.0420     | 0.0242                           | 0.0015     | 134                               | 527        | 153                              | 37         | 154                              | 9          |
| 21JD52_3                                  | 34            | 61   | 0.56 | 0.0906                            | 0.0071     | 3.1473                           | 0.2456     | 0.2517                           | 0.0090     | 1439                              | 143        | 1444                             | 60         | 1447                             | 46         |
| 21JD52_4                                  | 75            | 84   | 0.89 | 0.0497                            | 0.0042     | 0.1790                           | 0.0148     | 0.0262                           | 0.0006     | 179                               | 186        | 167                              | 13         | 166                              | 4          |
| 21JD52_5                                  | 229           | 474  | 0.48 | 0.1890                            | 0.0038     | 13.9394                          | 0.3383     | 0.5348                           | 0.0130     | 2733                              | 33         | 2746                             | 23         | 2762                             | 55         |
| 21JD52_6                                  | 72            | 115  | 0.63 | 0.0496                            | 0.0045     | 0.1730                           | 0.0153     | 0.0253                           | 0.0006     | 174                               | 198        | 162                              | 13         | 161                              | 4          |
| 21JD52_7                                  | 92            | 521  | 0.18 | 0.0494                            | 0.0035     | 0.1716                           | 0.0122     | 0.0252                           | 0.0007     | 169                               | 159        | 161                              | 11         | 160                              | 5          |
| 21JD52_8                                  | 80            | 121  | 0.66 | 0.0500                            | 0.0128     | 0.1729                           | 0.0433     | 0.0251                           | 0.0015     | 193                               | 507        | 162                              | 37         | 160                              | 9          |
| 21JD52_9                                  | 135           | 506  | 0.27 | 0.1921                            | 0.0039     | 13.2241                          | 0.3228     | 0.4991                           | 0.0122     | 2760                              | 33         | 2696                             | 23         | 2610                             | 52         |
| 21JD52_10                                 | 96            | 600  | 0.16 | 0.0490                            | 0.0025     | 0.1661                           | 0.0084     | 0.0246                           | 0.0004     | 148                               | 116        | 156                              | 7          | 157                              | 3          |
| 21JD52_11                                 | 97            | 110  | 0.87 | 0.0498                            | 0.0041     | 0.1650                           | 0.0134     | 0.0241                           | 0.0005     | 185                               | 181        | 155                              | 12         | 153                              | 3          |
| 21JD52_12                                 | 152           | 298  | 0.51 | 0.0642                            | 0.0030     | 0.8975                           | 0.0431     | 0.1014                           | 0.0028     | 749                               | 96         | 650                              | 23         | 622                              | 16         |
| 21JD52_13                                 | 182           | 228  | 0.80 | 0.0484                            | 0.0128     | 0.1706                           | 0.0442     | 0.0256                           | 0.0015     | 116                               | 528        | 160                              | 38         | 163                              | 10         |
| 21JD52_14                                 | 309           | 1400 | 0.22 | 0.1742                            | 0.0035     | 11.2241                          | 0.2850     | 0.4677                           | 0.0119     | 2599                              | 33         | 2542                             | 24         | 2474                             | 52         |
| 21JD52_15                                 | 244           | 626  | 0.39 | 0.0499                            | 0.0024     | 0.1891                           | 0.0088     | 0.0275                           | 0.0004     | 188                               | 106        | 176                              | 8          | 175                              | 3          |
| 21JD52_16                                 | 274           | 453  | 0.61 | 0.0490                            | 0.0024     | 0.1534                           | 0.0078     | 0.0227                           | 0.0006     | 150                               | 113        | 145                              | 7          | 145                              | 4          |
| 21JD52_17                                 | 113           | 353  | 0.32 | 0.0484                            | 0.0022     | 0.1631                           | 0.0073     | 0.0244                           | 0.0004     | 120                               | 103        | 153                              | 6          | 156                              | 2          |
| 21JD52_18                                 | 13            | 364  | 0.04 | 0.1629                            | 0.0033     | 9.9671                           | 0.2513     | 0.4442                           | 0.0111     | 2486                              | 34         | 2432                             | 23         | 2369                             | 50         |
| 21JD52_19                                 | 69            | 111  | 0.62 | 0.0560                            | 0.0051     | 0.1918                           | 0.0171     | 0.0248                           | 0.0006     | 453                               | 191        | 178                              | 15         | 158                              | 4          |
| 21JD52_20                                 | 204           | 1029 | 0.20 | 0.0519                            | 0.0027     | 0.1855                           | 0.0098     | 0.0259                           | 0.0007     | 282                               | 115        | 173                              | 8          | 165                              | 4          |
| <b>Cishan intrusion (sample 21JD53)</b>   |               |      |      |                                   |            |                                  |            |                                  |            |                                   |            |                                  |            |                                  |            |
| 21JD53_1                                  | 39            | 306  | 0.13 | 0.0468                            | 0.0117     | 0.1702                           | 0.0417     | 0.0264                           | 0.0016     | 41                                | 510        | 160                              | 36         | 168                              | 10         |
| 21JD53_2                                  | 1891          | 575  | 3.29 | 0.1529                            | 0.0017     | 8.2485                           | 0.1090     | 0.3912                           | 0.0049     | 2379                              | 19         | 2259                             | 12         | 2128                             | 23         |
| 21JD53_3                                  | 120           | 675  | 0.18 | 0.0485                            | 0.0020     | 0.1632                           | 0.0070     | 0.0244                           | 0.0006     | 123                               | 94         | 154                              | 6          | 156                              | 4          |
| 21JD53_4                                  | 209           | 895  | 0.23 | 0.0484                            | 0.0015     | 0.1861                           | 0.0064     | 0.0279                           | 0.0007     | 118                               | 73         | 173                              | 5          | 177                              | 4          |
| 21JD53_5                                  | 58            | 304  | 0.19 | 0.0492                            | 0.0024     | 0.1645                           | 0.0078     | 0.0242                           | 0.0004     | 159                               | 109        | 155                              | 7          | 154                              | 2          |
| 21JD53_6                                  | 774           | 936  | 0.83 | 0.0512                            | 0.0028     | 0.1740                           | 0.0096     | 0.0247                           | 0.0007     | 248                               | 120        | 163                              | 8          | 157                              | 4          |



| No.                                     | Content (ppm) |      | Th/U | Isotope ratio                        |        |                                     |        |                                     |        | Apparent age (Ma)                    |     |                                     |    |                                     |    |
|-----------------------------------------|---------------|------|------|--------------------------------------|--------|-------------------------------------|--------|-------------------------------------|--------|--------------------------------------|-----|-------------------------------------|----|-------------------------------------|----|
|                                         | Th            | U    |      | <sup>207</sup> Pb/ <sup>206</sup> Pb | 1σ     | <sup>207</sup> Pb/ <sup>235</sup> U | 1σ     | <sup>206</sup> Pb/ <sup>238</sup> U | 1σ     | <sup>207</sup> Pb/ <sup>206</sup> Pb | 1σ  | <sup>207</sup> Pb/ <sup>235</sup> U | 1σ | <sup>206</sup> Pb/ <sup>238</sup> U | 1σ |
| 21JD53_7                                | 65            | 124  | 0.53 | 0.0488                               | 0.0041 | 0.1613                              | 0.0131 | 0.0240                              | 0.0005 | 139                                  | 184 | 152                                 | 11 | 153                                 | 3  |
| 21JD53_8                                | 44            | 317  | 0.14 | 0.0525                               | 0.0096 | 0.2011                              | 0.0359 | 0.0278                              | 0.0014 | 306                                  | 370 | 186                                 | 30 | 177                                 | 8  |
| 21JD53_9                                | 77            | 315  | 0.24 | 0.1263                               | 0.0017 | 6.4919                              | 0.0983 | 0.3727                              | 0.0048 | 2047                                 | 24  | 2045                                | 13 | 2042                                | 22 |
| 21JD53_10                               | 172           | 572  | 0.30 | 0.0501                               | 0.0023 | 0.1742                              | 0.0079 | 0.0252                              | 0.0004 | 199                                  | 103 | 163                                 | 7  | 161                                 | 3  |
| 21JD53_11                               | 131           | 591  | 0.22 | 0.1771                               | 0.0037 | 10.1312                             | 0.2681 | 0.4155                              | 0.0108 | 2626                                 | 34  | 2447                                | 24 | 2240                                | 49 |
| 21JD53_12                               | 261           | 1158 | 0.23 | 0.0588                               | 0.0023 | 0.2050                              | 0.0085 | 0.0253                              | 0.0007 | 559                                  | 84  | 189                                 | 7  | 161                                 | 4  |
| 21JD53_13                               | 117           | 133  | 0.88 | 0.0502                               | 0.0057 | 0.1643                              | 0.0182 | 0.0237                              | 0.0007 | 205                                  | 243 | 155                                 | 16 | 151                                 | 4  |
| 21JD53_14                               | 92            | 758  | 0.12 | 0.0492                               | 0.0023 | 0.1724                              | 0.0084 | 0.0255                              | 0.0007 | 157                                  | 106 | 162                                 | 7  | 162                                 | 4  |
| 21JD53_15                               | 120           | 389  | 0.31 | 0.0491                               | 0.0021 | 0.1698                              | 0.0072 | 0.0251                              | 0.0004 | 155                                  | 97  | 159                                 | 6  | 160                                 | 2  |
| 21JD53_16                               | 36            | 108  | 0.33 | 0.0502                               | 0.0038 | 0.1740                              | 0.0130 | 0.0251                              | 0.0005 | 204                                  | 168 | 163                                 | 11 | 160                                 | 3  |
| 21JD53_17                               | 143           | 449  | 0.32 | 0.0508                               | 0.0020 | 0.1694                              | 0.0068 | 0.0242                              | 0.0004 | 232                                  | 90  | 159                                 | 6  | 154                                 | 2  |
| 21JD53_18                               | 72            | 181  | 0.40 | 0.0838                               | 0.0078 | 2.1157                              | 0.1942 | 0.1834                              | 0.0071 | 1288                                 | 171 | 1154                                | 63 | 1085                                | 39 |
| 21JD53_19                               | 104           | 574  | 0.18 | 0.1591                               | 0.0018 | 8.5421                              | 0.1137 | 0.3895                              | 0.0049 | 2446                                 | 19  | 2290                                | 12 | 2120                                | 22 |
| 21JD53_20                               | 151           | 257  | 0.59 | 0.0592                               | 0.0053 | 0.5613                              | 0.0501 | 0.0689                              | 0.0023 | 573                                  | 185 | 452                                 | 33 | 429                                 | 14 |
| <b>Shaizi intrusion (sample 21JD55)</b> |               |      |      |                                      |        |                                     |        |                                     |        |                                      |     |                                     |    |                                     |    |
| 21JD55_1                                | 727           | 1218 | 0.60 | 0.0503                               | 0.0012 | 0.1642                              | 0.0044 | 0.0236                              | 0.0002 | 209                                  | 57  | 154                                 | 4  | 151                                 | 1  |
| 21JD55_2                                | 255           | 806  | 0.32 | 0.0507                               | 0.0014 | 0.1559                              | 0.0043 | 0.0223                              | 0.0002 | 233                                  | 63  | 147                                 | 4  | 142                                 | 1  |
| 21JD55_3                                | 593           | 1496 | 0.40 | 0.0496                               | 0.0011 | 0.1668                              | 0.0045 | 0.0243                              | 0.0003 | 176                                  | 52  | 157                                 | 4  | 155                                 | 2  |
| 21JD55_4                                | 222           | 840  | 0.26 | 0.0488                               | 0.0013 | 0.1619                              | 0.0045 | 0.0241                              | 0.0003 | 200                                  | 63  | 152                                 | 4  | 153                                 | 2  |
| 21JD55_5                                | 87.9          | 91.2 | 0.96 | 0.0632                               | 0.0021 | 1.0127                              | 0.0337 | 0.1163                              | 0.0015 | 717                                  | 65  | 710                                 | 17 | 709                                 | 9  |
| 21JD55_6                                | 575           | 944  | 0.61 | 0.0498                               | 0.0016 | 0.1615                              | 0.0053 | 0.0235                              | 0.0002 | 183                                  | 74  | 152                                 | 5  | 150                                 | 1  |
| 21JD55_7                                | 318           | 285  | 1.12 | 0.0502                               | 0.0021 | 0.1994                              | 0.0112 | 0.0286                              | 0.0009 | 206                                  | 96  | 185                                 | 10 | 182                                 | 6  |
| 21JD55_8                                | 876           | 1910 | 0.46 | 0.0476                               | 0.0011 | 0.1596                              | 0.0037 | 0.0243                              | 0.0002 | 80                                   | 83  | 150                                 | 3  | 155                                 | 1  |
| 21JD55_9                                | 648           | 1025 | 0.63 | 0.0489                               | 0.0016 | 0.1675                              | 0.0061 | 0.0248                              | 0.0004 | 143                                  | 78  | 157                                 | 5  | 158                                 | 2  |
| 21JD55_10                               | 1490          | 2313 | 0.64 | 0.0490                               | 0.0012 | 0.1683                              | 0.0044 | 0.0249                              | 0.0002 | 146                                  | 59  | 158                                 | 4  | 158                                 | 1  |
| 21JD55_11                               | 202           | 752  | 0.27 | 0.0497                               | 0.0016 | 0.1571                              | 0.0052 | 0.0229                              | 0.0002 | 189                                  | 76  | 148                                 | 5  | 146                                 | 1  |
| 21JD55_12                               | 102           | 210  | 0.49 | 0.0460                               | 0.0034 | 0.1554                              | 0.0111 | 0.0249                              | 0.0004 | error                                |     | 147                                 | 10 | 159                                 | 3  |
| 21JD55_13                               | 64.5          | 85.9 | 0.75 | 0.0527                               | 0.0047 | 0.1747                              | 0.0126 | 0.0244                              | 0.0005 | 322                                  | 204 | 163                                 | 11 | 156                                 | 3  |

| No.                                     | Content (ppm) |      | Th/U | Isotope ratio                        |        |                                     |        |                                     |        | Apparent age (Ma)                    |     |                                     |    |                                     |    |
|-----------------------------------------|---------------|------|------|--------------------------------------|--------|-------------------------------------|--------|-------------------------------------|--------|--------------------------------------|-----|-------------------------------------|----|-------------------------------------|----|
|                                         | Th            | U    |      | <sup>207</sup> Pb/ <sup>206</sup> Pb | 1σ     | <sup>207</sup> Pb/ <sup>235</sup> U | 1σ     | <sup>206</sup> Pb/ <sup>238</sup> U | 1σ     | <sup>207</sup> Pb/ <sup>206</sup> Pb | 1σ  | <sup>207</sup> Pb/ <sup>235</sup> U | 1σ | <sup>206</sup> Pb/ <sup>238</sup> U | 1σ |
| 21JD55_14                               | 230           | 877  | 0.26 | 0.0506                               | 0.0014 | 0.1624                              | 0.0049 | 0.0232                              | 0.0002 | 233                                  | 67  | 153                                 | 4  | 148                                 | 1  |
| 21JD55_15                               | 284           | 959  | 0.30 | 0.0493                               | 0.0012 | 0.1636                              | 0.0046 | 0.0241                              | 0.0004 | 161                                  | 57  | 154                                 | 4  | 153                                 | 3  |
| 21JD55_16                               | 1462          | 774  | 1.89 | 0.0516                               | 0.0017 | 0.1648                              | 0.0051 | 0.0232                              | 0.0002 | 265                                  | 76  | 155                                 | 4  | 148                                 | 1  |
| 21JD55_17                               | 507           | 1818 | 0.28 | 0.0521                               | 0.0012 | 0.1767                              | 0.0040 | 0.0246                              | 0.0002 | 300                                  | 52  | 165                                 | 3  | 156                                 | 1  |
| 21JD55_18                               | 151           | 738  | 0.20 | 0.0498                               | 0.0014 | 0.1571                              | 0.0044 | 0.0229                              | 0.0002 | 183                                  | 69  | 148                                 | 4  | 146                                 | 1  |
| 21JD55_19                               | 285           | 255  | 1.12 | 0.0672                               | 0.0047 | 0.2251                              | 0.0164 | 0.0242                              | 0.0003 | 843                                  | 142 | 206                                 | 14 | 154                                 | 2  |
| 21JD55_20                               | 329           | 1074 | 0.31 | 0.0492                               | 0.0011 | 0.1600                              | 0.0039 | 0.0236                              | 0.0003 | 167                                  | 54  | 151                                 | 3  | 150                                 | 2  |
| 21JD55_21                               | 135           | 1283 | 0.11 | 0.0509                               | 0.0013 | 0.1806                              | 0.0049 | 0.0257                              | 0.0002 | 235                                  | 61  | 169                                 | 4  | 164                                 | 1  |
| 21JD55_22                               | 1287          | 2054 | 0.63 | 0.0500                               | 0.0011 | 0.1714                              | 0.0036 | 0.0249                              | 0.0002 | 195                                  | 56  | 161                                 | 3  | 158                                 | 1  |
| 21JD55_23                               | 82.8          | 136  | 0.61 | 0.0529                               | 0.0028 | 0.1761                              | 0.0090 | 0.0243                              | 0.0004 | 324                                  | 119 | 165                                 | 8  | 155                                 | 2  |
| 21JD55_24                               | 311           | 289  | 1.08 | 0.0497                               | 0.0026 | 0.1822                              | 0.0107 | 0.0264                              | 0.0005 | 189                                  | 120 | 170                                 | 9  | 168                                 | 3  |
| 21JD55_25                               | 514           | 1394 | 0.37 | 0.0510                               | 0.0011 | 0.1689                              | 0.0039 | 0.0240                              | 0.0003 | 243                                  | 56  | 158                                 | 3  | 153                                 | 2  |
| <b>Weideshan suite</b>                  |               |      |      |                                      |        |                                     |        |                                     |        |                                      |     |                                     |    |                                     |    |
| <b>Aishan intrusion (sample 21JD37)</b> |               |      |      |                                      |        |                                     |        |                                     |        |                                      |     |                                     |    |                                     |    |
| 21JD37_1                                | 277           | 313  | 0.89 | 0.0509                               | 0.0021 | 0.1242                              | 0.0049 | 0.0178                              | 0.0002 | 235                                  | 64  | 119                                 | 4  | 114                                 | 2  |
| 21JD37_2                                | 421           | 350  | 1.20 | 0.0536                               | 0.0027 | 0.1364                              | 0.0064 | 0.0185                              | 0.0002 | 354                                  | 113 | 130                                 | 6  | 118                                 | 1  |
| 21JD37_3                                | 278           | 389  | 0.71 | 0.0486                               | 0.0020 | 0.1214                              | 0.0047 | 0.0182                              | 0.0002 | 128                                  | 103 | 116                                 | 4  | 116                                 | 1  |
| 21JD37_4                                | 227           | 278  | 0.82 | 0.0485                               | 0.0030 | 0.1280                              | 0.0082 | 0.0192                              | 0.0003 | 120                                  | 141 | 122                                 | 7  | 122                                 | 2  |
| 21JD37_5                                | 369           | 394  | 0.94 | 0.0488                               | 0.0025 | 0.1229                              | 0.0062 | 0.0183                              | 0.0002 | 139                                  | 120 | 118                                 | 6  | 117                                 | 1  |
| 21JD37_6                                | 514           | 473  | 1.09 | 0.0482                               | 0.0020 | 0.1210                              | 0.0047 | 0.0183                              | 0.0002 | 122                                  | 98  | 116                                 | 4  | 117                                 | 1  |
| 21JD37_7                                | 243           | 301  | 0.81 | 0.0474                               | 0.0022 | 0.1218                              | 0.0056 | 0.0187                              | 0.0002 | 78                                   | 98  | 117                                 | 5  | 120                                 | 1  |
| 21JD37_8                                | 342           | 414  | 0.82 | 0.0492                               | 0.0020 | 0.1273                              | 0.0053 | 0.0188                              | 0.0002 | 167                                  | 98  | 122                                 | 5  | 120                                 | 1  |
| 21JD37_9                                | 395           | 472  | 0.84 | 0.0475                               | 0.0021 | 0.1184                              | 0.0054 | 0.0181                              | 0.0002 | 72                                   | 117 | 114                                 | 5  | 116                                 | 1  |
| 21JD37_10                               | 434           | 417  | 1.04 | 0.0470                               | 0.0019 | 0.1196                              | 0.0047 | 0.0185                              | 0.0002 | 56                                   | 87  | 115                                 | 4  | 118                                 | 1  |
| 21JD37_11                               | 254           | 374  | 0.68 | 0.0469                               | 0.0019 | 0.1168                              | 0.0047 | 0.0181                              | 0.0002 | 56                                   | 87  | 112                                 | 4  | 116                                 | 1  |
| 21JD37_12                               | 502           | 374  | 1.34 | 0.0518                               | 0.0025 | 0.1291                              | 0.0062 | 0.0181                              | 0.0002 | 276                                  | 110 | 123                                 | 6  | 116                                 | 1  |
| 21JD37_13                               | 262           | 334  | 0.78 | 0.0468                               | 0.0018 | 0.1202                              | 0.0046 | 0.0187                              | 0.0002 | 39                                   | 89  | 115                                 | 4  | 119                                 | 1  |
| 21JD37_14                               | 242           | 273  | 0.89 | 0.0616                               | 0.0036 | 0.1586                              | 0.0091 | 0.0188                              | 0.0002 | 657                                  | 131 | 150                                 | 8  | 120                                 | 2  |

| No.                                     | Content (ppm) |      | Th/U | Isotope ratio                        |        |                                     |        |                                     |        | Apparent age (Ma)                    |     |                                     |    |                                     |    |
|-----------------------------------------|---------------|------|------|--------------------------------------|--------|-------------------------------------|--------|-------------------------------------|--------|--------------------------------------|-----|-------------------------------------|----|-------------------------------------|----|
|                                         | Th            | U    |      | <sup>207</sup> Pb/ <sup>206</sup> Pb | 1σ     | <sup>207</sup> Pb/ <sup>235</sup> U | 1σ     | <sup>206</sup> Pb/ <sup>238</sup> U | 1σ     | <sup>207</sup> Pb/ <sup>206</sup> Pb | 1σ  | <sup>207</sup> Pb/ <sup>235</sup> U | 1σ | <sup>206</sup> Pb/ <sup>238</sup> U | 1σ |
| 21JD37_15                               | 200           | 286  | 0.70 | 0.1011                               | 0.0099 | 0.2665                              | 0.0267 | 0.0192                              | 0.0002 | 1656                                 | 181 | 240                                 | 21 | 123                                 | 1  |
| 21JD37_16                               | 114           | 161  | 0.71 | 0.0464                               | 0.0035 | 0.1208                              | 0.0085 | 0.0192                              | 0.0003 | 20                                   | 170 | 116                                 | 8  | 122                                 | 2  |
| 21JD37_17                               | 251           | 285  | 0.88 | 0.0528                               | 0.0024 | 0.1348                              | 0.0058 | 0.0186                              | 0.0002 | 320                                  | 102 | 128                                 | 5  | 119                                 | 1  |
| 21JD37_18                               | 175           | 231  | 0.76 | 0.0931                               | 0.0056 | 0.2342                              | 0.0142 | 0.0183                              | 0.0003 | 1500                                 | 314 | 214                                 | 12 | 117                                 | 2  |
| 21JD37_19                               | 448           | 463  | 0.97 | 0.0459                               | 0.0017 | 0.1186                              | 0.0046 | 0.0187                              | 0.0002 | 54                                   | 83  | 114                                 | 4  | 119                                 | 1  |
| 21JD37_20                               | 388           | 385  | 1.01 | 0.0624                               | 0.0031 | 0.1586                              | 0.0080 | 0.0184                              | 0.0002 | 689                                  | 101 | 149                                 | 7  | 118                                 | 1  |
| 21JD37_21                               | 297           | 425  | 0.70 | 0.0559                               | 0.0025 | 0.1415                              | 0.0059 | 0.0184                              | 0.0002 | 450                                  | 100 | 134                                 | 5  | 118                                 | 2  |
| 21JD37_22                               | 264           | 332  | 0.80 | 0.0487                               | 0.0023 | 0.1228                              | 0.0057 | 0.0183                              | 0.0002 | 200                                  | 111 | 118                                 | 5  | 117                                 | 1  |
| 21JD37_23                               | 488           | 534  | 0.91 | 0.0484                               | 0.0016 | 0.1232                              | 0.0040 | 0.0185                              | 0.0002 | 117                                  | 80  | 118                                 | 4  | 118                                 | 1  |
| 21JD37_24                               | 220           | 248  | 0.89 | 0.0467                               | 0.0024 | 0.1204                              | 0.0062 | 0.0187                              | 0.0002 | 32                                   | 119 | 115                                 | 6  | 119                                 | 1  |
| 21JD37_25                               | 157           | 205  | 0.77 | 0.0523                               | 0.0031 | 0.1308                              | 0.0067 | 0.0185                              | 0.0003 | 298                                  | 131 | 125                                 | 6  | 118                                 | 2  |
| <b>Yashan intrusion (sample 21JD56)</b> |               |      |      |                                      |        |                                     |        |                                     |        |                                      |     |                                     |    |                                     |    |
| 21JD56_1                                | 968           | 1374 | 0.70 | 0.0499                               | 0.0037 | 0.1252                              | 0.0084 | 0.0188                              | 0.0004 | 191                                  | 179 | 120                                 | 8  | 120                                 | 2  |
| 21JD56_2                                | 948           | 1411 | 0.67 | 0.0477                               | 0.0030 | 0.1273                              | 0.0077 | 0.0192                              | 0.0004 | 87                                   | 141 | 122                                 | 7  | 122                                 | 2  |
| 21JD56_3                                | 689           | 1177 | 0.59 | 0.0523                               | 0.0057 | 0.1239                              | 0.0103 | 0.0182                              | 0.0005 | 302                                  | 250 | 119                                 | 9  | 117                                 | 3  |
| 21JD56_4                                | 1421          | 2529 | 0.56 | 0.0494                               | 0.0027 | 0.1254                              | 0.0068 | 0.0185                              | 0.0003 | 169                                  | 132 | 120                                 | 6  | 118                                 | 2  |
| 21JD56_5                                | 609           | 844  | 0.72 | 0.0501                               | 0.0039 | 0.1264                              | 0.0089 | 0.0189                              | 0.0004 | 198                                  | 181 | 121                                 | 8  | 120                                 | 3  |
| 21JD56_6                                | 748           | 1313 | 0.57 | 0.0521                               | 0.0048 | 0.1260                              | 0.0099 | 0.0186                              | 0.0004 | 287                                  | 213 | 121                                 | 9  | 119                                 | 3  |
| 21JD56_7                                | 1068          | 1926 | 0.55 | 0.0517                               | 0.0033 | 0.1279                              | 0.0075 | 0.0181                              | 0.0004 | 272                                  | 146 | 122                                 | 7  | 116                                 | 2  |
| 21JD56_8                                | 914           | 1499 | 0.61 | 0.0490                               | 0.0041 | 0.1267                              | 0.0096 | 0.0188                              | 0.0005 | 146                                  | 185 | 121                                 | 9  | 120                                 | 3  |
| 21JD56_9                                | 663           | 1374 | 0.48 | 0.0496                               | 0.0042 | 0.1258                              | 0.0098 | 0.0190                              | 0.0007 | 176                                  | 185 | 120                                 | 9  | 121                                 | 4  |
| 21JD56_10                               | 1336          | 1583 | 0.84 | 0.0501                               | 0.0037 | 0.1289                              | 0.0085 | 0.0192                              | 0.0004 | 211                                  | 174 | 123                                 | 8  | 123                                 | 2  |
| 21JD56_11                               | 955           | 1582 | 0.60 | 0.0495                               | 0.0046 | 0.1243                              | 0.0109 | 0.0189                              | 0.0005 | 172                                  | 204 | 119                                 | 10 | 121                                 | 3  |
| 21JD56_12                               | 1425          | 1703 | 0.84 | 0.0496                               | 0.0030 | 0.1261                              | 0.0072 | 0.0188                              | 0.0004 | 189                                  | 147 | 121                                 | 6  | 120                                 | 2  |
| 21JD56_13                               | 813           | 1464 | 0.56 | 0.0487                               | 0.0039 | 0.1278                              | 0.0097 | 0.0190                              | 0.0004 | 200                                  | 109 | 122                                 | 9  | 121                                 | 3  |
| 21JD56_14                               | 534           | 1167 | 0.46 | 0.0491                               | 0.0043 | 0.1246                              | 0.0101 | 0.0188                              | 0.0005 | 154                                  | 193 | 119                                 | 9  | 120                                 | 3  |
| 21JD56_15                               | 1053          | 1658 | 0.64 | 0.0494                               | 0.0031 | 0.1256                              | 0.0078 | 0.0185                              | 0.0004 | 165                                  | 146 | 120                                 | 7  | 118                                 | 2  |
| 21JD56_16                               | 760           | 1487 | 0.51 | 0.0483                               | 0.0038 | 0.1262                              | 0.0086 | 0.0187                              | 0.0004 | 122                                  | 165 | 121                                 | 8  | 119                                 | 2  |

| No.                                    | Content (ppm) |      | Th/U | Isotope ratio                        |        |                                     |        |                                     |        | Apparent age (Ma)                    |     |                                     |    |                                     |    |
|----------------------------------------|---------------|------|------|--------------------------------------|--------|-------------------------------------|--------|-------------------------------------|--------|--------------------------------------|-----|-------------------------------------|----|-------------------------------------|----|
|                                        | Th            | U    |      | <sup>207</sup> Pb/ <sup>206</sup> Pb | 1σ     | <sup>207</sup> Pb/ <sup>235</sup> U | 1σ     | <sup>206</sup> Pb/ <sup>238</sup> U | 1σ     | <sup>207</sup> Pb/ <sup>206</sup> Pb | 1σ  | <sup>207</sup> Pb/ <sup>235</sup> U | 1σ | <sup>206</sup> Pb/ <sup>238</sup> U | 1σ |
| 21JD56_17                              | 2104          | 2422 | 0.87 | 0.0488                               | 0.0030 | 0.1261                              | 0.0080 | 0.0187                              | 0.0005 | 200                                  | 76  | 121                                 | 7  | 120                                 | 3  |
| 21JD56_18                              | 1417          | 1824 | 0.78 | 0.0485                               | 0.0034 | 0.1245                              | 0.0079 | 0.0191                              | 0.0004 | 124                                  | 156 | 119                                 | 7  | 122                                 | 2  |
| 21JD56_19                              | 1025          | 1858 | 0.55 | 0.0487                               | 0.0030 | 0.1280                              | 0.0076 | 0.0191                              | 0.0004 | 132                                  | 202 | 122                                 | 7  | 122                                 | 2  |
| 21JD56_20                              | 1141          | 1599 | 0.71 | 0.0497                               | 0.0032 | 0.1223                              | 0.0075 | 0.0182                              | 0.0004 | 189                                  | 145 | 117                                 | 7  | 116                                 | 3  |
| 21JD56_21                              | 1723          | 1727 | 1.00 | 0.0486                               | 0.0031 | 0.1226                              | 0.0077 | 0.0183                              | 0.0003 | 128                                  | 148 | 117                                 | 7  | 117                                 | 2  |
| 21JD56_22                              | 545           | 857  | 0.64 | 0.0493                               | 0.0056 | 0.1298                              | 0.0135 | 0.0193                              | 0.0005 | 165                                  | 244 | 124                                 | 12 | 124                                 | 3  |
| 21JD56_23                              | 624           | 1264 | 0.49 | 0.0484                               | 0.0040 | 0.1222                              | 0.0096 | 0.0184                              | 0.0004 | 117                                  | 185 | 117                                 | 9  | 118                                 | 3  |
| 21JD56_24                              | 458           | 1053 | 0.43 | 0.0512                               | 0.0044 | 0.1293                              | 0.0099 | 0.0196                              | 0.0005 | 256                                  | 198 | 123                                 | 9  | 125                                 | 3  |
| 21JD56_25                              | 569           | 1092 | 0.52 | 0.0510                               | 0.0052 | 0.1207                              | 0.0114 | 0.0182                              | 0.0004 | 243                                  | 218 | 116                                 | 10 | 116                                 | 3  |
| <b>Nansu intrusion (sample 21JD57)</b> |               |      |      |                                      |        |                                     |        |                                     |        |                                      |     |                                     |    |                                     |    |
| 21JD57_1                               | 1668          | 748  | 2.23 | 0.0496                               | 0.0023 | 0.1263                              | 0.0059 | 0.0185                              | 0.0003 | 174                                  | 107 | 121                                 | 5  | 118                                 | 2  |
| 21JD57_2                               | 155           | 201  | 0.77 | 0.0532                               | 0.0051 | 0.1435                              | 0.0135 | 0.0196                              | 0.0005 | 338                                  | 204 | 136                                 | 12 | 125                                 | 3  |
| 21JD57_3                               | 349           | 327  | 1.07 | 0.0530                               | 0.0035 | 0.1363                              | 0.0087 | 0.0187                              | 0.0004 | 329                                  | 141 | 130                                 | 8  | 119                                 | 2  |
| 21JD57_4                               | 761           | 778  | 0.98 | 0.0523                               | 0.0028 | 0.1486                              | 0.0078 | 0.0206                              | 0.0004 | 347                                  | 136 | 131                                 | 8  | 119                                 | 2  |
| 21JD57_5                               | 149           | 136  | 1.09 | 0.0500                               | 0.0045 | 0.1308                              | 0.0115 | 0.0190                              | 0.0004 | 193                                  | 196 | 125                                 | 10 | 121                                 | 3  |
| 21JD57_6                               | 277           | 273  | 1.02 | 0.0471                               | 0.0034 | 0.1284                              | 0.0092 | 0.0198                              | 0.0004 | 54                                   | 164 | 123                                 | 8  | 126                                 | 2  |
| 21JD57_7                               | 137           | 159  | 0.86 | 0.0473                               | 0.0041 | 0.1208                              | 0.0102 | 0.0185                              | 0.0004 | 62                                   | 194 | 116                                 | 9  | 118                                 | 3  |
| 21JD57_8                               | 375           | 280  | 1.34 | 0.0532                               | 0.0058 | 0.1470                              | 0.0156 | 0.0201                              | 0.0006 | 336                                  | 228 | 139                                 | 14 | 128                                 | 4  |
| 21JD57_9                               | 341           | 236  | 1.45 | 0.0538                               | 0.0049 | 0.1464                              | 0.0131 | 0.0198                              | 0.0005 | 361                                  | 194 | 139                                 | 12 | 126                                 | 3  |
| 21JD57_10                              | 258           | 364  | 0.71 | 0.0527                               | 0.0032 | 0.1431                              | 0.0085 | 0.0197                              | 0.0004 | 317                                  | 132 | 136                                 | 8  | 126                                 | 2  |
| 21JD57_11                              | 378           | 383  | 0.99 | 0.0529                               | 0.0044 | 0.1338                              | 0.0109 | 0.0183                              | 0.0004 | 326                                  | 178 | 128                                 | 10 | 117                                 | 3  |
| 21JD57_12                              | 553           | 609  | 0.91 | 0.0518                               | 0.0040 | 0.1277                              | 0.0097 | 0.0179                              | 0.0004 | 278                                  | 169 | 122                                 | 9  | 114                                 | 2  |
| 21JD57_13                              | 278           | 274  | 1.01 | 0.0523                               | 0.0033 | 0.1345                              | 0.0084 | 0.0187                              | 0.0004 | 298                                  | 138 | 128                                 | 7  | 119                                 | 2  |
| 21JD57_14                              | 245           | 376  | 0.65 | 0.0494                               | 0.0037 | 0.1279                              | 0.0095 | 0.0188                              | 0.0004 | 167                                  | 167 | 122                                 | 9  | 120                                 | 2  |
| 21JD57_15                              | 202           | 200  | 1.01 | 0.0483                               | 0.0062 | 0.1276                              | 0.0160 | 0.0192                              | 0.0006 | 114                                  | 277 | 122                                 | 14 | 122                                 | 4  |
| 21JD57_16                              | 268           | 199  | 1.35 | 0.0490                               | 0.0043 | 0.1369                              | 0.0118 | 0.0203                              | 0.0005 | 149                                  | 194 | 130                                 | 11 | 127                                 | 3  |
| 21JD57_17                              | 1354          | 2756 | 0.49 | 0.0527                               | 0.0014 | 0.1463                              | 0.0040 | 0.0201                              | 0.0003 | 116                                  | 141 | 124                                 | 7  | 124                                 | 2  |
| 21JD57_18                              | 238           | 195  | 1.22 | 0.0537                               | 0.0046 | 0.1473                              | 0.0123 | 0.0199                              | 0.0005 | 358                                  | 181 | 140                                 | 11 | 127                                 | 3  |

| No.                                        | Content (ppm) |     | Th/U | Isotope ratio                     |            |                                  |            |                                  |            | Apparent age (Ma)                 |            |                                  |            |                                  |            |
|--------------------------------------------|---------------|-----|------|-----------------------------------|------------|----------------------------------|------------|----------------------------------|------------|-----------------------------------|------------|----------------------------------|------------|----------------------------------|------------|
|                                            | Th            | U   |      | $^{207}\text{Pb}/^{206}\text{Pb}$ | 1 $\sigma$ | $^{207}\text{Pb}/^{235}\text{U}$ | 1 $\sigma$ | $^{206}\text{Pb}/^{238}\text{U}$ | 1 $\sigma$ | $^{207}\text{Pb}/^{206}\text{Pb}$ | 1 $\sigma$ | $^{207}\text{Pb}/^{235}\text{U}$ | 1 $\sigma$ | $^{206}\text{Pb}/^{238}\text{U}$ | 1 $\sigma$ |
| 21JD57_19                                  | 385           | 378 | 1.02 | 0.0486                            | 0.0029     | 0.1260                           | 0.0075     | 0.0188                           | 0.0003     | 127                               | 136        | 121                              | 7          | 120                              | 2          |
| 21JD57_20                                  | 250           | 366 | 0.68 | 0.0457                            | 0.0027     | 0.1186                           | 0.0070     | 0.0188                           | 0.0003     | 0                                 | 120        | 114                              | 6          | 120                              | 2          |
| <b>Weideshan intrusion (sample 21JD58)</b> |               |     |      |                                   |            |                                  |            |                                  |            |                                   |            |                                  |            |                                  |            |
| 21JD58_01                                  | 415           | 356 | 1.17 | 0.0507                            | 0.0038     | 0.13034                          | 0.00947    | 0.01865                          | 0.00038    | 226                               | 163        | 124                              | 9          | 119                              | 2          |
| 21JD58_02                                  | 238           | 159 | 1.50 | 0.053                             | 0.007      | 0.13858                          | 0.01783    | 0.01895                          | 0.00059    | 330                               | 274        | 132                              | 16         | 121                              | 4          |
| 21JD58_03                                  | 436           | 302 | 1.44 | 0.0519                            | 0.0046     | 0.13464                          | 0.01166    | 0.0188                           | 0.00043    | 283                               | 190        | 128                              | 10         | 120                              | 3          |
| 21JD58_04                                  | 307           | 228 | 1.35 | 0.0439                            | 0.0041     | 0.11223                          | 0.01038    | 0.01855                          | 0.00042    | 0                                 | 98         | 108                              | 9          | 119                              | 3          |
| 21JD58_05                                  | 160           | 134 | 1.19 | 0.0496                            | 0.0062     | 0.1207                           | 0.01483    | 0.01766                          | 0.00051    | 176                               | 269        | 116                              | 13         | 113                              | 3          |
| 21JD58_06                                  | 481           | 279 | 1.72 | 0.0441                            | 0.0045     | 0.10585                          | 0.01056    | 0.01742                          | 0.00041    | 0                                 | 125        | 102                              | 10         | 111                              | 3          |
| 21JD58_07                                  | 247           | 251 | 0.99 | 0.0508                            | 0.0051     | 0.13063                          | 0.01286    | 0.01865                          | 0.00047    | 232                               | 217        | 125                              | 12         | 119                              | 3          |
| 21JD58_08                                  | 179           | 141 | 1.27 | 0.0515                            | 0.0073     | 0.1326                           | 0.01826    | 0.01868                          | 0.00063    | 262                               | 295        | 126                              | 16         | 119                              | 4          |
| 21JD58_09                                  | 446           | 313 | 1.43 | 0.0473                            | 0.0041     | 0.12172                          | 0.01031    | 0.01866                          | 0.00041    | 65                                | 194        | 117                              | 9          | 119                              | 3          |
| 21JD58_10                                  | 362           | 281 | 1.29 | 0.0514                            | 0.0054     | 0.12502                          | 0.01291    | 0.01764                          | 0.00046    | 259                               | 225        | 120                              | 12         | 113                              | 3          |
| 21JD58_11                                  | 523           | 389 | 1.34 | 0.0506                            | 0.0043     | 0.13233                          | 0.01096    | 0.01898                          | 0.00043    | 221                               | 185        | 126                              | 10         | 121                              | 3          |
| 21JD58_12                                  | 343           | 437 | 0.79 | 0.0462                            | 0.0043     | 0.11339                          | 0.01031    | 0.01779                          | 0.00041    | 10                                | 209        | 109                              | 9          | 114                              | 3          |
| 21JD58_13                                  | 235           | 202 | 1.16 | 0.0448                            | 0.004      | 0.11618                          | 0.01006    | 0.01879                          | 0.00041    | 0                                 | 138        | 112                              | 9          | 120                              | 3          |
| 21JD58_14                                  | 108           | 117 | 0.92 | 0.0467                            | 0.0068     | 0.11597                          | 0.01643    | 0.01802                          | 0.0006     | 33                                | 315        | 111                              | 15         | 115                              | 4          |
| 21JD58_15                                  | 182           | 153 | 1.19 | 0.0434                            | 0.0049     | 0.10904                          | 0.01196    | 0.01822                          | 0.00047    | 0                                 | 111        | 105                              | 11         | 116                              | 3          |
| 21JD58_16                                  | 239           | 276 | 0.87 | 0.0463                            | 0.0037     | 0.11825                          | 0.00927    | 0.01854                          | 0.00039    | 11                                | 182        | 114                              | 8          | 119                              | 2          |
| 21JD58_17                                  | 97            | 115 | 0.85 | 0.048                             | 0.0065     | 0.12084                          | 0.01593    | 0.01828                          | 0.00057    | 96                                | 292        | 116                              | 14         | 117                              | 4          |
| 21JD58_18                                  | 294           | 354 | 0.83 | 0.0497                            | 0.0035     | 0.12841                          | 0.00883    | 0.01875                          | 0.00037    | 179                               | 155        | 123                              | 8          | 120                              | 2          |
| 21JD58_19                                  | 959           | 696 | 1.38 | 0.0497                            | 0.0024     | 0.1341                           | 0.00646    | 0.01956                          | 0.00032    | 182                               | 110        | 128                              | 6          | 125                              | 2          |
| 21JD58_20                                  | 309           | 240 | 1.29 | 0.0463                            | 0.0037     | 0.11785                          | 0.00937    | 0.01847                          | 0.00039    | 13                                | 184        | 113                              | 9          | 118                              | 2          |

**Table S2. Results of Hf isotope analysis and model age calculation of zircon by LA-ICP-MS.**

| Sample No.                             | t(Ma)  | $^{176}\text{Yb}/^{177}\text{Hf}$ | $^{176}\text{Lu}/^{177}\text{Hf}$ | $^{176}\text{Hf}/^{177}\text{Hf}$ | $\varepsilon_{\text{Hf}}(t)$ | $T_{\text{DM1}}(\text{Ma})$ | $T_{\text{DM2}}(\text{Ma})$ | $f_{\text{Lu/Hf}}$ |
|----------------------------------------|--------|-----------------------------------|-----------------------------------|-----------------------------------|------------------------------|-----------------------------|-----------------------------|--------------------|
| <b>Linglong suite (sample 21JD41)</b>  |        |                                   |                                   |                                   |                              |                             |                             |                    |
| 21JD41_01                              | 227.2  | 0.001910                          | 0.000071                          | 0.282235                          | -14.0                        | 1401                        | 2149                        | -1.00              |
| 21JD41_02                              | 158.5  | 0.082801                          | 0.003717                          | 0.282233                          | -16.0                        | 1548                        | 2218                        | -0.89              |
| 21JD41_03                              | 156.2  | 0.091689                          | 0.004106                          | 0.282251                          | -15.4                        | 1539                        | 2182                        | -0.88              |
| 21JD41_04                              | 238.8  | 0.010523                          | 0.000476                          | 0.282414                          | -7.5                         | 1168                        | 1744                        | -0.99              |
| 21JD41_05                              | 153.4  | 0.054377                          | 0.002422                          | 0.282238                          | -15.8                        | 1485                        | 2201                        | -0.93              |
| 21JD41_06                              | 328.9  | 0.069901                          | 0.002944                          | 0.281857                          | -25.8                        | 2065                        | 2959                        | -0.91              |
| 21JD41_07                              | 155.0  | 0.044947                          | 0.002126                          | 0.282134                          | -19.4                        | 1624                        | 2432                        | -0.94              |
| 21JD41_08                              | 143.2  | 0.031632                          | 0.001404                          | 0.282164                          | -18.5                        | 1549                        | 2366                        | -0.96              |
| 21JD41_09                              | 156.9  | 0.033705                          | 0.001676                          | 0.282195                          | -17.1                        | 1517                        | 2292                        | -0.95              |
| 21JD41_10                              | 230.5  | 0.065655                          | 0.002750                          | 0.282123                          | -18.3                        | 1668                        | 2420                        | -0.92              |
| 21JD41_11                              | 158.7  | 0.028309                          | 0.001409                          | 0.282219                          | -16.2                        | 1472                        | 2235                        | -0.96              |
| 21JD41_12                              | 217.8  | 0.078180                          | 0.003366                          | 0.282159                          | -17.4                        | 1642                        | 2351                        | -0.90              |
| 21JD41_13                              | 162.8  | 0.036140                          | 0.001493                          | 0.282118                          | -19.7                        | 1618                        | 2458                        | -0.96              |
| 21JD41_14                              | 162.1  | 0.028213                          | 0.001234                          | 0.282242                          | -15.3                        | 1433                        | 2181                        | -0.96              |
| 21JD41_15                              | 165.8  | 0.111980                          | 0.004800                          | 0.282075                          | -21.5                        | 1841                        | 2572                        | -0.86              |
| 21JD41_16                              | 207.2  | 0.003265                          | 0.000153                          | 0.282483                          | -5.7                         | 1064                        | 1608                        | -1.00              |
| 21JD41_17                              | 168.0  | 0.068042                          | 0.002517                          | 0.282164                          | -18.1                        | 1597                        | 2359                        | -0.92              |
| 21JD41_18                              | 3000.0 | 0.044038                          | 0.001789                          | 0.281258                          | 10.5                         | 2838                        | 2746                        | -0.95              |
| 21JD41_19                              | 226.2  | 0.015432                          | 0.000628                          | 0.282132                          | -17.8                        | 1563                        | 2383                        | -0.98              |
| 21JD41_20                              | 160.0  | 0.076054                          | 0.003255                          | 0.281949                          | -25.9                        | 1947                        | 2843                        | -0.90              |
| 21JD41_21                              | 228.0  | 0.001566                          | 0.000054                          | 0.282161                          | -16.6                        | 1500                        | 2313                        | -1.00              |
| 21JD41_22                              | 149.6  | 0.017199                          | 0.000803                          | 0.282126                          | -19.7                        | 1578                        | 2445                        | -0.98              |
| 21JD41_23                              | 162.4  | 0.033347                          | 0.001432                          | 0.282335                          | -12.0                        | 1309                        | 1975                        | -0.96              |
| 21JD41_24                              | 163.3  | 0.074863                          | 0.003289                          | 0.282114                          | -20.1                        | 1706                        | 2478                        | -0.90              |
| 21JD41_25                              | 158.7  | 0.088775                          | 0.003997                          | 0.282429                          | -9.1                         | 1264                        | 1783                        | -0.88              |
| <b>Weideshan suite (sample 21JD37)</b> |        |                                   |                                   |                                   |                              |                             |                             |                    |
| 21JD37_01                              | 113.6  | 0.018036                          | 0.000728                          | 0.282243                          | -16.3                        | 1413                        | 2205                        | -0.98              |

| Sample No. | t(Ma) | $^{176}\text{Yb}/^{177}\text{Hf}$ | $^{176}\text{Lu}/^{177}\text{Hf}$ | $^{176}\text{Hf}/^{177}\text{Hf}$ | $\epsilon_{\text{Hf}}(t)$ | $T_{\text{DM1}}(\text{Ma})$ | $T_{\text{DM2}}(\text{Ma})$ | $f_{\text{Lu/Hf}}$ |
|------------|-------|-----------------------------------|-----------------------------------|-----------------------------------|---------------------------|-----------------------------|-----------------------------|--------------------|
| 21JD37_02  | 118.3 | 0.016206                          | 0.000659                          | 0.282214                          | -17.2                     | 1451                        | 2267                        | -0.98              |
| 21JD37_03  | 116.2 | 0.021240                          | 0.000845                          | 0.282190                          | -18.1                     | 1491                        | 2322                        | -0.97              |
| 21JD37_04  | 122.3 | 0.018718                          | 0.000780                          | 0.282222                          | -16.8                     | 1444                        | 2247                        | -0.98              |
| 21JD37_05  | 116.8 | 0.015707                          | 0.000652                          | 0.282172                          | -18.7                     | 1508                        | 2362                        | -0.98              |
| 21JD37_06  | 117.0 | 0.021724                          | 0.000865                          | 0.282226                          | -16.8                     | 1442                        | 2242                        | -0.97              |
| 21JD37_07  | 119.5 | 0.018268                          | 0.000747                          | 0.282195                          | -17.9                     | 1481                        | 2310                        | -0.98              |
| 21JD37_08  | 119.8 | 0.022097                          | 0.000898                          | 0.282193                          | -17.9                     | 1488                        | 2313                        | -0.97              |
| 21JD37_09  | 115.6 | 0.020331                          | 0.000821                          | 0.282214                          | -17.3                     | 1456                        | 2269                        | -0.98              |
| 21JD37_10  | 118.4 | 0.025514                          | 0.001026                          | 0.282250                          | -15.9                     | 1414                        | 2187                        | -0.97              |
| 21JD37_11  | 115.8 | 0.019182                          | 0.000799                          | 0.282271                          | -15.2                     | 1377                        | 2142                        | -0.98              |
| 21JD37_12  | 115.7 | 0.014076                          | 0.000576                          | 0.282195                          | -17.9                     | 1473                        | 2310                        | -0.98              |
| 21JD37_13  | 119.3 | 0.016577                          | 0.000661                          | 0.282213                          | -17.2                     | 1451                        | 2268                        | -0.98              |
| 21JD37_14  | 119.9 | 0.019096                          | 0.000736                          | 0.282264                          | -15.4                     | 1384                        | 2154                        | -0.98              |
| 21JD37_15  | 122.5 | 0.015829                          | 0.000644                          | 0.282214                          | -17.1                     | 1450                        | 2264                        | -0.98              |
| 21JD37_16  | 122.4 | 0.016382                          | 0.000652                          | 0.282279                          | -14.8                     | 1361                        | 2120                        | -0.98              |
| 21JD37_17  | 118.5 | 0.025864                          | 0.001020                          | 0.282238                          | -16.4                     | 1431                        | 2214                        | -0.97              |
| 21JD37_18  | 117.0 | 0.014679                          | 0.000607                          | 0.282163                          | -19.0                     | 1518                        | 2380                        | -0.98              |
| 21JD37_19  | 119.4 | 0.021329                          | 0.000846                          | 0.282262                          | -15.5                     | 1391                        | 2161                        | -0.97              |
| 21JD37_20  | 117.6 | 0.018631                          | 0.000739                          | 0.282221                          | -17.0                     | 1443                        | 2251                        | -0.98              |
| 21JD37_21  | 117.8 | 0.022444                          | 0.000899                          | 0.282197                          | -17.8                     | 1483                        | 2306                        | -0.97              |
| 21JD37_22  | 116.8 | 0.019068                          | 0.000761                          | 0.282201                          | -17.7                     | 1472                        | 2296                        | -0.98              |
| 21JD37_23  | 118.1 | 0.026412                          | 0.001076                          | 0.282173                          | -18.7                     | 1524                        | 2360                        | -0.97              |
| 21JD37_24  | 119.5 | 0.014799                          | 0.000605                          | 0.282245                          | -16.1                     | 1405                        | 2196                        | -0.98              |
| 21JD37_25  | 117.9 | 0.013979                          | 0.000558                          | 0.282162                          | -19.0                     | 1518                        | 2382                        | -0.98              |

**Table S3. Whole-rock major and trace element data for the Linglong and Weideshan suites in the Jiaodong Peninsula, China.**

|                                    | Linglong suite |             |             |             |             |             |             |             |             |             |             |             | Weideshan suite |             |             |             |             |             |             |             |             |             |             |             |
|------------------------------------|----------------|-------------|-------------|-------------|-------------|-------------|-------------|-------------|-------------|-------------|-------------|-------------|-----------------|-------------|-------------|-------------|-------------|-------------|-------------|-------------|-------------|-------------|-------------|-------------|
|                                    | 21JD4          | 21JD4       | 21JD4       | 21JD4       | 21JD5       | 21JD3           | 21JD3       | 21JD3       | 21JD3       | 21JD5       |
|                                    | 1-1            | 1-2         | 1-3         | 1-4         | 2-1         | 2-2         | 2-3         | 2-4         | 3-1         | 3-2         | 3-3         | 3-4         | 7-1             | 7-2         | 7-3         | 7-4         | 6-1         | 6-2         | 6-3         | 6-4         | 7-1         | 7-2         | 7-3         | 7-4         |
| Major (wt%)                        |                |             |             |             |             |             |             |             |             |             |             |             |                 |             |             |             |             |             |             |             |             |             |             |             |
| SiO <sub>2</sub>                   | 73.00          | 73.69       | 73.33       | 74.47       | 75.65       | 74.93       | 75.74       | 75.86       | 73.20       | 72.73       | 73.30       | 72.55       | 73.19           | 67.70       | 69.22       | 67.25       | 69.27       | 70.20       | 71.00       | 69.32       | 71.42       | 71.33       | 73.18       | 71.50       |
| Na <sub>2</sub> O                  | 4.15           | 4.15        | 4.14        | 4.09        | 4.53        | 4.45        | 4.28        | 4.40        | 4.35        | 4.34        | 4.09        | 4.39        | 3.30            | 3.77        | 3.68        | 3.87        | 4.10        | 3.87        | 3.88        | 4.03        | 3.95        | 3.88        | 4.10        | 4.10        |
| MgO                                | 0.33           | 0.32        | 0.26        | 0.24        | 0.08        | 0.07        | 0.06        | 0.08        | 0.26        | 0.27        | 0.29        | 0.28        | 0.94            | 1.77        | 1.35        | 1.78        | 1.51        | 1.25        | 1.19        | 1.40        | 0.81        | 0.77        | 0.81        | 0.79        |
| Al <sub>2</sub> O <sub>3</sub>     | 14.22          | 13.73       | 14.14       | 13.54       | 14.16       | 14.45       | 14.07       | 14.01       | 14.85       | 15.00       | 14.70       | 15.07       | 13.20           | 14.59       | 14.78       | 15.23       | 14.65       | 14.65       | 14.36       | 15.10       | 14.42       | 14.53       | 13.61       | 14.63       |
| P <sub>2</sub> O <sub>5</sub>      | 0.04           | 0.05        | 0.04        | 0.05        | 0.03        | 0.04        | 0.03        | 0.04        | 0.04        | 0.04        | 0.04        | 0.04        | 0.12            | 0.21        | 0.16        | 0.21        | 0.17        | 0.14        | 0.13        | 0.16        | 0.12        | 0.11        | 0.11        | 0.11        |
| K <sub>2</sub> O                   | 3.28           | 3.24        | 3.24        | 3.19        | 3.93        | 4.87        | 4.41        | 4.12        | 3.88        | 4.00        | 4.24        | 4.01        | 3.85            | 3.45        | 3.62        | 3.30        | 3.76        | 4.22        | 4.16        | 3.93        | 4.52        | 5.05        | 3.44        | 4.35        |
| CaO                                | 2.07           | 2.11        | 1.88        | 1.86        | 0.53        | 0.48        | 0.61        | 0.37        | 1.61        | 1.64        | 1.57        | 1.64        | 2.10            | 3.07        | 2.76        | 3.34        | 2.77        | 2.32        | 2.28        | 2.69        | 1.78        | 1.64        | 1.94        | 1.84        |
| TiO <sub>2</sub>                   | 0.16           | 0.17        | 0.16        | 0.24        | 0.13        | 0.12        | 0.13        | 0.14        | 0.13        | 0.14        | 0.12        | 0.15        | 0.25            | 0.44        | 0.36        | 0.44        | 0.36        | 0.30        | 0.30        | 0.33        | 0.25        | 0.24        | 0.25        | 0.24        |
| MnO                                | 0.04           | 0.04        | 0.03        | 0.03        | 0.00        | 0.00        | 0.00        | 0.01        | 0.03        | 0.03        | 0.02        | 0.03        | 0.03            | 0.06        | 0.04        | 0.06        | 0.05        | 0.05        | 0.03        | 0.05        | 0.03        | 0.03        | 0.03        | 0.03        |
| TFe <sub>2</sub> O <sub>3</sub>    | 1.55           | 1.57        | 1.57        | 1.54        | 0.27        | 0.09        | 0.21        | 0.33        | 1.18        | 1.31        | 1.05        | 1.32        | 2.13            | 3.50        | 2.88        | 3.48        | 2.68        | 2.30        | 2.11        | 2.56        | 1.81        | 1.71        | 1.77        | 1.67        |
| LOI                                | 0.54           | 0.45        | 0.57        | 0.39        | 0.63        | 0.48        | 0.41        | 0.52        | 0.43        | 0.46        | 0.52        | 0.48        | 0.54            | 1.02        | 0.66        | 0.54        | 0.65        | 0.65        | 0.52        | 0.39        | 0.86        | 0.67        | 0.70        | 0.70        |
| Total                              | 99.39          | 99.52       | 99.37       | 99.64       | 99.94       | 99.98       | 99.95       | 99.88       | 99.96       | 99.96       | 99.94       | 99.96       | 99.65           | 99.57       | 99.51       | 99.49       | 99.97       | 99.95       | 99.96       | 99.96       | 99.97       | 99.96       | 99.94       | 99.96       |
| Fe <sub>2</sub> O <sub>3</sub>     | 0.50           | 0.53        | 0.56        | 0.51        | 0.03        | (0.02)      | 0.02        | 0.04        | 0.16        | 0.32        | 0.12        | 0.30        | 0.52            | 1.27        | 1.15        | 1.19        | 0.78        | 0.74        | 0.86        | 0.91        | 0.74        | 0.56        | 0.48        | 0.59        |
| FeO <sup>T</sup>                   | 1.40           | 1.41        | 1.41        | 1.39        | 0.24        | 0.08        | 0.19        | 0.30        | 1.06        | 1.18        | 0.94        | 1.19        | 1.91            | 3.15        | 2.59        | 3.13        | 2.41        | 2.07        | 1.90        | 2.30        | 1.63        | 1.54        | 1.59        | 1.50        |
| FeO                                | 0.95           | 0.93        | 0.91        | 0.93        | 0.22        | 0.10        | 0.17        | 0.26        | 0.92        | 0.89        | 0.84        | 0.92        | 1.45            | 2.01        | 1.56        | 2.06        | 1.71        | 1.40        | 1.12        | 1.48        | 0.96        | 1.03        | 1.16        | 0.97        |
| Na <sub>2</sub> O/K <sub>2</sub> O | 1.27           | 1.28        | 1.28        | 1.29        | 1.15        | 0.91        | 0.97        | 1.07        | 1.12        | 1.09        | 0.96        | 1.09        | 0.86            | 1.09        | 1.01        | 1.17        | 1.09        | 0.92        | 0.93        | 1.03        | 0.87        | 0.77        | 1.19        | 0.94        |
| Na <sub>2</sub> O+K <sub>2</sub> O | 7.43           | 7.39        | 7.38        | 7.28        | 8.46        | 9.32        | 8.69        | 8.52        | 8.23        | 8.34        | 8.33        | 8.40        | 7.16            | 7.21        | 7.30        | 7.17        | 7.86        | 8.09        | 8.04        | 7.96        | 8.47        | 8.93        | 7.54        | 8.45        |
| A/NK                               | 1.37           | 1.33        | 1.37        | 1.33        | 1.21        | 1.15        | 1.19        | 1.20        | 1.31        | 1.31        | 1.30        | 1.30        | 1.37            | 1.47        | 1.48        | 1.53        | 1.35        | 1.34        | 1.32        | 1.39        | 1.26        | 1.22        | 1.30        | 1.28        |
| A/CNK                              | 1.00           | 0.97        | 1.03        | 1.00        | 1.12        | 1.07        | 1.09        | 1.13        | 1.04        | 1.04        | 1.04        | 1.03        | 0.98            | 0.94        | 0.98        | 0.95        | 0.92        | 0.97        | 0.95        | 0.96        | 0.98        | 0.98        | 0.97        | 0.99        |
| Mg#                                | 29.42          | 28.52       | 24.43       | 23.75       | 36.99       | 60.64       | 36.14       | 32.44       | 30.39       | 28.99       | 35.36       | 29.59       | 46.55           | 50.00       | 48.11       | 50.31       | 52.74       | 51.84       | 52.77       | 52.00       | 46.99       | 47.15       | 47.55       | 48.38       |
| R1                                 | 2589.9<br>5    | 2646.7<br>8 | 2624.6<br>0 | 2728.3<br>5 | 2500.6<br>3 | 2265.1<br>6 | 2484.6<br>5 | 2515.0<br>1 | 2393.6<br>2 | 2338.4<br>5 | 2410.9<br>7 | 2305.3<br>0 | 2753.8<br>8     | 2297.7<br>2 | 2403.8<br>1 | 2264.1<br>2 | 2221.0<br>3 | 2267.2<br>8 | 2338.7<br>9 | 2216.6<br>6 | 2263.5<br>3 | 2156.9<br>1 | 2574.1<br>1 | 2255.2<br>9 |
| R2                                 | 516.93         | 511.23      | 491.70      | 477.09      | 338.43      | 338.27      | 344.23      | 318.37      | 476.45      | 483.10      | 470.71      | 484.97      | 529.61          | 702.35      | 652.42      | 744.41      | 658.67      | 597.62      | 584.67      | 653.48      | 513.50      | 498.69      | 514.73      | 523.04      |
| Trace (ppm)                        |                |             |             |             |             |             |             |             |             |             |             |             |                 |             |             |             |             |             |             |             |             |             |             |             |
| Li                                 | 11.8           | 11.3        | 11.4        | 11.4        | 7.4         | 2.65        | 4.81        | 3.92        | 13          | 12.2        | 11          | 13.2        | 15.1            | 23.7        | 16.6        | 21.5        | 25          | 12.8        | 14.9        | 18.4        | 17.2        | 17.7        | 19.9        | 17.5        |
| Be                                 | 1.03           | 1.05        | 0.947       | 1.08        | 1.3         | 1.59        | 1.3         | 0.954       | 1.29        | 1.29        | 1.25        | 1.29        | 1.33            | 1.74        | 1.69        | 1.83        | 1.72        | 1.81        | 1.73        | 1.83        | 3.14        | 2.9         | 3.35        | 3.09        |



|    | Linglong suite |       |        |        |       |       |       |       |       |       |       |       | Weideshan suite |        |             |        |       |       |       |       |       |       |       |       |
|----|----------------|-------|--------|--------|-------|-------|-------|-------|-------|-------|-------|-------|-----------------|--------|-------------|--------|-------|-------|-------|-------|-------|-------|-------|-------|
|    | 21JD4          | 21JD4 | 21JD4  | 21JD4  | 21JD5 | 21JD3           | 21JD3  | 21JD3       | 21JD3  | 21JD5 |
|    | 1-1            | 1-2   | 1-3    | 1-4    | 2-1   | 2-2   | 2-3   | 2-4   | 3-1   | 3-2   | 3-3   | 3-4   | 7-1             | 7-2    | 7-3         | 7-4    | 6-1   | 6-2   | 6-3   | 6-4   | 7-1   | 7-2   | 7-3   | 7-4   |
| Sc | 7.54           | 7.71  | 4.05   | 4.49   | 1.46  | 1.73  | 1.65  | 1.33  | 1.59  | 1.69  | 1.19  | 1.53  | 5.37            | 7.5    | 6.62        | 7.41   | 5.62  | 4.48  | 3.94  | 11.2  | 3.61  | 3.75  | 4.38  | 3.15  |
| V  | 11.6           | 12.1  | 10.9   | 10.3   | 2.85  | 2.66  | 3.13  | 2.59  | 3.92  | 4.47  | 4.43  | 5.29  | 30.9            | 50.5   | 40.7        | 50.4   | 40    | 35    | 34.1  | 45.4  | 22.3  | 21.3  | 21.1  | 21.3  |
| Cr | 4.46           | 4.57  | 2.89   | 4.35   | 0.972 | 1.09  | 0.754 | 0.704 | 1.1   | 0.996 | 1.51  | 1.25  | 16.7            | 32.2   | 27.2        | 32.7   | 28.3  | 24.2  | 22.6  | 28.8  | 12.9  | 11.6  | 11.6  | 11.4  |
| Co | 1.67           | 1.63  | 1.3    | 1.3    | 0.329 | 0.106 | 0.215 | 0.195 | 0.832 | 0.934 | 0.823 | 0.913 | 4.62            | 8.32   | 6.47        | 8.02   | 7.09  | 5.97  | 5.17  | 6.55  | 3.83  | 3.47  | 3.7   | 3.36  |
| Ni | 1.88           | 1.67  | 1      | 1.42   | 0.701 | 0.472 | 0.607 | 0.53  | 1.32  | 1.36  | 1.19  | 1.29  | 6.97            | 14.5   | 11.2        | 14.1   | 12.2  | 9.61  | 9.09  | 10.6  | 5.75  | 5.21  | 5.75  | 5.37  |
| Cu | 1.93           | 1.86  | 2.13   | 1.62   | 9.45  | 1.04  | 2.71  | 1.45  | 2.29  | 3.1   | 2.37  | 2.64  | 2.72            | 6.72   | 4.67        | 8.45   | 5.6   | 5.27  | 5.6   | 4.72  | 3.93  | 3.85  | 3.82  | 3.8   |
| Zn | 37.9           | 38.3  | 36.5   | 38.2   | 7.02  | 5.17  | 5.12  | 9.2   | 35.6  | 36    | 29.4  | 37.2  | 30.7            | 52.7   | 34.9        | 48.9   | 55.4  | 39.9  | 30.5  | 40.1  | 25.2  | 24.1  | 24.1  | 23.1  |
| Ga | 15             | 15.4  | 14.9   | 14.8   | 16.7  | 22.2  | 17.6  | 15.4  | 18.4  | 18.9  | 17.4  | 18.1  | 14.3            | 17.8   | 17.1        | 17.9   | 18    | 17.1  | 16.8  | 17.2  | 19.1  | 18.9  | 18.5  | 19    |
| Rb | 62.1           | 60.6  | 65.9   | 70.1   | 105   | 129   | 121   | 106   | 84.2  | 90.8  | 87    | 85.6  | 112             | 104    | 106         | 97.5   | 101   | 106   | 110   | 102   | 154   | 174   | 129   | 151   |
| Sr | 701            | 705   | 716    | 701    | 287   | 202   | 261   | 244   | 596   | 640   | 586   | 614   | 417             | 626    | 623         | 676    | 604   | 535   | 501   | 594   | 562   | 509   | 471   | 522   |
| Y  | 11.1           | 12.7  | 6.83   | 6.89   | 11.2  | 13.6  | 5.95  | 4.23  | 5.9   | 4.95  | 5.22  | 5.55  | 7.86            | 11     | 10.1        | 11.8   | 8.94  | 8.57  | 8.02  | 8.58  | 9.74  | 8.58  | 8.56  | 8.88  |
| Zr | 95             | 94.9  | 71.9   | 81.4   | 30.6  | 38.4  | 13.4  | 24.8  | 24.9  | 26.4  | 21.2  | 27.5  | 98.7            | 127    | 96.8        | 121    | 25.9  | 27.2  | 22.6  | 21.1  | 22.5  | 22.8  | 23.5  | 16.5  |
| Nb | 6.32           | 7.49  | 5.47   | 6.12   | 11.9  | 8.13  | 8.27  | 6     | 6.28  | 6.12  | 5.12  | 5.87  | 7.76            | 11.3   | 10.5        | 11.5   | 9.73  | 10.3  | 8.64  | 9.9   | 14.5  | 12.7  | 13.3  | 13.2  |
| Cs | 0.338          | 0.327 | 0.433  | 0.596  | 0.802 | 0.627 | 0.746 | 0.701 | 0.766 | 1.08  | 0.69  | 0.659 | 1.12            | 1.51   | 1.41        | 1.39   | 1.54  | 1.27  | 1.32  | 1.4   | 1.1   | 1.05  | 0.982 | 1.13  |
| Ba | 2080           | 2140  | 2270   | 2210   | 896   | 606   | 770   | 844   | 1796  | 2044  | 1994  | 1917  | 587             | 990    | 998         | 1060   | 817   | 1092  | 700   | 849   | 1280  | 1363  | 678   | 1128  |
| La | 19             | 14.9  | 20.6   | 18.6   | 5.12  | 2.58  | 2.66  | 3.59  | 28.8  | 35.5  | 27.7  | 30    | 30.2            | 63.9   | 53.4        | 54.4   | 44.9  | 36.1  | 44.6  | 42    | 56.3  | 48.1  | 47.5  | 39.3  |
| Ce | 32.9           | 27    | 34.6   | 31.1   | 9.7   | 4.67  | 4.58  | 6.83  | 48    | 62.4  | 47.2  | 51.2  | 60.7            | 112    | 93.2        | 99.1   | 79    | 63.7  | 75.4  | 74.1  | 95.3  | 79.8  | 80.8  | 72.2  |
| Pr | 3.6            | 3.06  | 3.68   | 3.34   | 1.27  | 0.637 | 0.682 | 0.914 | 5.08  | 6.58  | 4.95  | 5.4   | 6.57            | 11.4   | 9.67        | 10.6   | 8.72  | 7.11  | 7.97  | 8.05  | 10    | 8.68  | 8.76  | 8.01  |
| Nd | 11.9           | 10.7  | 11.4   | 10.4   | 5.19  | 2.53  | 2.65  | 3.68  | 17.7  | 22.1  | 16.7  | 18.3  | 22.8            | 38.3   | 32.3        | 36.7   | 31.4  | 25.6  | 26.6  | 29.5  | 31.6  | 28.4  | 27.7  | 28.4  |
| Sm | 2.07           | 2.07  | 1.61   | 1.52   | 1.29  | 0.772 | 0.726 | 0.919 | 2.31  | 2.65  | 2.22  | 2.35  | 3.39            | 5.1    | 4.41        | 5.26   | 4.02  | 3.59  | 3.49  | 3.81  | 4.29  | 3.89  | 3.58  | 4.03  |
| Eu | 0.709          | 0.667 | 0.571  | 0.594  | 0.358 | 0.277 | 0.349 | 0.384 | 0.68  | 0.791 | 0.732 | 0.736 | 0.924           | 1.27   | 1.07        | 1.28   | 1.06  | 0.929 | 0.913 | 1.02  | 1.05  | 0.98  | 0.849 | 0.961 |
| Gd | 1.87           | 1.96  | 1.29   | 1.32   | 1.04  | 0.733 | 0.594 | 0.701 | 2.15  | 2.33  | 2.09  | 2.11  | 2.31            | 3.67   | 3.13        | 3.67   | 3.75  | 3.13  | 3.23  | 3.39  | 3.94  | 3.35  | 3.55  | 3.4   |
| Tb | 0.292          | 0.312 | 0.189  | 0.187  | 0.232 | 0.207 | 0.132 | 0.129 | 0.268 | 0.258 | 0.236 | 0.247 | 0.321           | 0.483  | 0.411       | 0.487  | 0.464 | 0.389 | 0.395 | 0.425 | 0.468 | 0.43  | 0.413 | 0.417 |
| Dy | 1.7            | 1.93  | 0.97   | 0.98   | 1.43  | 1.42  | 0.744 | 0.641 | 1.25  | 1.11  | 1.17  | 1.19  | 1.39            | 2.02   | 1.75        | 2.11   | 2.04  | 1.81  | 1.77  | 1.84  | 2     | 1.83  | 1.94  | 1.86  |
| Ho | 0.36           | 0.411 | 0.203  | 0.208  | 0.323 | 0.399 | 0.173 | 0.133 | 0.19  | 0.163 | 0.172 | 0.173 | 0.254           | 0.37   | 0.324       | 0.384  | 0.31  | 0.285 | 0.272 | 0.283 | 0.313 | 0.275 | 0.281 | 0.287 |
| Er | 1.026          | 1.159 | 0.6004 | 0.6194 | 0.961 | 1.35  | 0.53  | 0.414 | 0.571 | 0.592 | 0.549 | 0.598 | 0.7229<br>5     | 1.0735 | 0.9224<br>5 | 1.1115 | 0.937 | 0.956 | 0.837 | 0.945 | 0.962 | 0.871 | 0.911 | 0.931 |
| Tm | 0.169          | 0.188 | 0.0967 | 0.0979 | 0.181 | 0.307 | 0.109 | 0.078 | 0.07  | 0.073 | 0.066 | 0.083 | 0.101           | 0.143  | 0.125       | 0.153  | 0.136 | 0.136 | 0.122 | 0.134 | 0.152 | 0.127 | 0.136 | 0.128 |
| Yb | 1.1            | 1.25  | 0.66   | 0.688  | 1.18  | 2.48  | 0.692 | 0.542 | 0.402 | 0.484 | 0.359 | 0.44  | 0.68            | 0.964  | 0.878       | 1.01   | 0.88  | 0.805 | 0.758 | 0.907 | 0.965 | 0.852 | 0.87  | 0.874 |

|                      | Linglong suite |        |             |             |        |        |        |        |             |             |             |             | Weideshan suite |              |               |              |             |             |             |             |             |             |             |             |
|----------------------|----------------|--------|-------------|-------------|--------|--------|--------|--------|-------------|-------------|-------------|-------------|-----------------|--------------|---------------|--------------|-------------|-------------|-------------|-------------|-------------|-------------|-------------|-------------|
|                      | 21JD4          | 21JD4  | 21JD4       | 21JD4       | 21JD5  | 21JD5  | 21JD5  | 21JD5  | 21JD5       | 21JD5       | 21JD5       | 21JD5       | 21JD3           | 21JD3        | 21JD3         | 21JD3        | 21JD5       |
|                      | 1-1            | 1-2    | 1-3         | 1-4         | 2-1    | 2-2    | 2-3    | 2-4    | 3-1         | 3-2         | 3-3         | 3-4         | 7-1             | 7-2          | 7-3           | 7-4          | 6-1         | 6-2         | 6-3         | 6-4         | 7-1         | 7-2         | 7-3         | 7-4         |
| Lu                   | 0.178          | 0.198  | 0.107       | 0.109       | 0.186  | 0.366  | 0.116  | 0.087  | 0.051       | 0.06        | 0.042       | 0.059       | 0.101           | 0.143        | 0.131         | 0.154        | 0.122       | 0.123       | 0.109       | 0.125       | 0.142       | 0.112       | 0.122       | 0.124       |
| Hf                   | 2.33           | 2.29   | 1.63        | 1.88        | 1.1    | 2.34   | 0.576  | 0.927  | 0.68        | 0.705       | 0.635       | 0.794       | 2.54            | 3.28         | 2.64          | 3.25         | 0.925       | 1.09        | 0.914       | 0.937       | 1.01        | 0.991       | 1.05        | 0.766       |
| Ta                   | 0.395          | 0.43   | 0.323       | 0.298       | 1.01   | 1.32   | 0.416  | 0.313  | 0.463       | 0.34        | 0.381       | 0.316       | 0.602           | 0.818        | 0.799         | 0.848        | 0.734       | 0.836       | 0.744       | 0.766       | 1.05        | 0.868       | 0.933       | 0.951       |
| Pb                   | 18.2           | 18.5   | 19          | 20.2        | 16.1   | 23.2   | 22.5   | 17.6   | 24.5        | 26.9        | 25.6        | 24.3        | 20.4            | 17.7         | 17.9          | 17.2         | 18.4        | 21          | 19          | 19.5        | 20.8        | 21.1        | 16.1        | 19.3        |
| Th                   | 3.65           | 2.93   | 3.93        | 3.63        | 3.58   | 2.92   | 1.98   | 2.14   | 5.93        | 5.38        | 5.23        | 4.95        | 17.6            | 16.8         | 19.8          | 21.9         | 14          | 14.8        | 15.6        | 14.1        | 22.2        | 22.2        | 24.6        | 23          |
| U                    | 0.526          | 0.541  | 0.45        | 0.496       | 1.02   | 1.25   | 0.462  | 0.853  | 0.719       | 0.668       | 0.667       | 0.581       | 2.15            | 2.77         | 2.78          | 2.66         | 1.94        | 2.38        | 2           | 2.14        | 3.56        | 3.21        | 3.84        | 3.45        |
| Mo                   | 0.050          | 0.587  | 0.724       | 0.356       | 0.06   | 0.037  | 0.085  | 0.083  | 0.087       | 0.152       | 0.054       | 0.151       | 0.650           | 1.878        | 3.201         | 1.036        | 0.173       | 0.191       | 0.576       | 0.2         | 0.302       | 0.344       | 0.286       | 0.487       |
| Cd                   | 0.013          | 0.011  | 0.023       | -0.024      | 0.019  | 0.014  | 0.006  | 0.022  | 0.028       | 0.02        | 0.019       | 0.028       | 0.016           | 0.025        | 0.028         | 0.019        | 0.034       | 0.025       | 0.034       | 0.023       | 0.02        | 0.014       | 0.014       | 0.011       |
| In                   | 0.030          | 0.033  | 0.016       | 0.058       | 0.006  | 0.005  | 0.004  | 0.005  | 0.018       | 0.018       | 0.014       | 0.018       | 0.015           | 0.024        | 0.021         | 0.027        | 0.024       | 0.021       | 0.018       | 0.023       | 0.016       | 0.016       | 0.016       | 0.019       |
| Sb                   | 0.078          | 0.060  | 0.076       | 0.197       | 0.115  | 0.064  | 0.075  | 0.104  | 0.024       | 0.02        | 0.02        | 0.043       | 0.096           | 0.062        | 0.060         | 0.058        | 0.021       | 0.033       | 0.273       | 0.013       | 0.017       | 0.019       | 0.017       | 0.167       |
| W                    | 0.072          | 0.291  | 0.119       | 0.079       | 0.325  | 0.209  | 0.233  | 0.178  | 0.057       | 0.057       | 0.066       | 0.054       | 0.114           | 0.305        | 0.411         | 1.272        | 0.125       | 0.129       | 0.259       | 0.105       | 0.329       | 0.142       | 0.124       | 0.135       |
| Tl                   | 0.296          | 0.295  | 0.310       | 0.339       | 0.557  | 0.587  | 0.581  | 0.598  | 0.459       | 0.487       | 0.474       | 0.484       | 0.481           | 0.489        | 0.463         | 0.450        | 0.622       | 0.672       | 0.635       | 0.644       | 0.767       | 0.84        | 0.641       | 0.762       |
| Bi                   | 0.048          | 0.031  | 0.031       | 0.023       | 0.017  | 0.008  | 0.009  | 0.006  | 0.01        | 0.008       | 0.01        | 0.004       | 0.037           | 0.040        | 0.039         | 0.046        | 0.034       | 0.028       | 0.049       | 0.027       | 0.018       | 0.018       | 0.015       | 0.018       |
| Σ REE                | 76.874         | 65.805 | 76.577<br>1 | 69.763<br>3 | 28.461 | 18.728 | 14.737 | 19.042 | 107.52<br>2 | 135.09<br>1 | 104.18<br>6 | 112.88<br>6 | 130.46<br>395   | 240.83<br>65 | 201.72<br>145 | 216.41<br>95 | 177.73<br>9 | 144.66<br>3 | 166.46<br>6 | 166.52<br>9 | 207.48<br>2 | 177.69<br>7 | 177.41<br>2 | 160.92<br>2 |
| Σ LREE               | 70.179         | 58.397 | 72.461      | 65.554      | 22.928 | 11.466 | 11.647 | 16.317 | 102.57      | 130.02<br>1 | 99.502      | 107.98<br>6 | 124.58<br>4     | 231.97       | 194.05        | 207.34       | 169.1       | 137.02<br>9 | 158.97<br>3 | 158.48      | 198.54      | 169.85      | 169.18<br>9 | 152.90<br>1 |
| Σ HREE               | 6.695          | 7.408  | 4.1161      | 4.2093      | 5.533  | 7.262  | 3.09   | 2.725  | 4.952       | 5.07        | 4.684       | 4.9         | 5.8799<br>5     | 8.8665       | 7.6714<br>5   | 9.0795       | 8.639       | 7.634       | 7.493       | 8.049       | 8.942       | 7.847       | 8.223       | 8.021       |
| Σ LREE/Σ HREE        | 10.48          | 7.88   | 17.60       | 15.57       | 4.14   | 1.58   | 3.77   | 5.99   | 20.71       | 25.65       | 21.24       | 22.04       | 21.19           | 26.16        | 25.30         | 22.84        | 19.57       | 17.95       | 21.22       | 19.69       | 22.20       | 21.65       | 20.58       | 19.06       |
| δEu                  | 1.08           | 1.00   | 1.17        | 1.25        | 0.92   | 1.11   | 1.58   | 1.41   | 0.92        | 0.95        | 1.02        | 0.99        | 0.96            | 0.86         | 0.84          | 0.85         | 0.82        | 0.83        | 0.82        | 0.85        | 0.77        | 0.81        | 0.72        | 0.77        |
| δCe                  | 0.90           | 0.91   | 0.89        | 0.88        | 0.89   | 0.85   | 0.80   | 0.89   | 0.88        | 0.92        | 0.90        | 0.90        | 0.99            | 0.93         | 0.92          | 0.93         | 0.90        | 0.90        | 0.89        | 0.91        | 0.89        | 0.87        | 0.89        | 0.93        |
| (La/Yb) <sub>N</sub> | 11.65          | 8.04   | 21.04       | 18.23       | 2.93   | 0.70   | 2.59   | 4.47   | 48.30       | 49.45       | 52.02       | 45.97       | 29.94           | 44.69        | 41.00         | 36.31        | 34.40       | 30.23       | 39.67       | 31.22       | 39.33       | 38.06       | 36.81       | 30.32       |
| (La/Lu) <sub>N</sub> | 11.09          | 7.82   | 20.00       | 17.72       | 2.86   | 0.73   | 2.38   | 4.29   | 58.66       | 61.46       | 68.51       | 52.82       | 31.06           | 46.42        | 42.34         | 36.69        | 38.23       | 30.49       | 42.50       | 34.90       | 41.18       | 44.61       | 40.44       | 32.92       |
| (La/Sm) <sub>N</sub> | 5.77           | 4.53   | 8.05        | 7.70        | 2.50   | 2.10   | 2.30   | 2.46   | 7.84        | 8.43        | 7.85        | 8.03        | 5.60            | 7.88         | 7.62          | 6.51         | 7.03        | 6.33        | 8.04        | 6.93        | 8.26        | 7.78        | 8.35        | 6.13        |
| (Ce/Y) <sub>N</sub>  | 5.77           | 4.53   | 8.05        | 7.70        | 2.50   | 2.10   | 2.30   | 2.46   | 7.84        | 8.43        | 7.85        | 8.03        | 5.60            | 7.88         | 7.62          | 6.51         | 7.03        | 6.33        | 8.04        | 6.93        | 8.26        | 7.78        | 8.35        | 6.13        |
| (Ce/Yb) <sub>N</sub> | 7.74           | 5.59   | 13.56       | 11.69       | 2.13   | 0.49   | 1.71   | 3.26   | 30.89       | 33.35       | 34.01       | 30.10       | 23.09           | 30.05        | 27.46         | 25.38        | 23.22       | 20.47       | 25.73       | 21.13       | 25.54       | 24.23       | 24.02       | 21.37       |
| (Gd/Lu) <sub>N</sub> | 1.31           | 1.23   | 1.50        | 1.51        | 0.70   | 0.25   | 0.64   | 1.00   | 5.24        | 4.83        | 6.19        | 4.45        | 2.84            | 3.19         | 2.97          | 2.96         | 3.82        | 3.16        | 3.68        | 3.37        | 3.45        | 3.72        | 3.62        | 3.41        |
| Sr/Y                 | 63.15          | 55.51  | 104.83      | 101.74      | 25.63  | 14.85  | 43.87  | 57.68  | 101.02      | 129.29      | 112.26      | 110.63      | 53.05           | 56.91        | 61.68         | 57.29        | 67.56       | 62.43       | 62.47       | 69.23       | 57.70       | 59.32       | 55.02       | 58.78       |
| (Gd/Yb) <sub>N</sub> | 1.37           | 1.27   | 1.58        | 1.55        | 0.71   | 0.24   | 0.69   | 1.04   | 4.32        | 3.88        | 4.70        | 3.87        | 2.74            | 3.07         | 2.88          | 2.93         | 3.44        | 3.14        | 3.44        | 3.02        | 3.29        | 3.17        | 3.29        | 3.14        |

**Table S4. Sr-Nd-Pb isotope data for the Linglong and Weideshan suites in the Jiaodong Peninsula, China.**

| No.                                    | Sr                                |                                     | Nd                                |                                       |                           |                             |                             | Pb                        |                                   |                                   |                                   |                                       |                                       |                                       |
|----------------------------------------|-----------------------------------|-------------------------------------|-----------------------------------|---------------------------------------|---------------------------|-----------------------------|-----------------------------|---------------------------|-----------------------------------|-----------------------------------|-----------------------------------|---------------------------------------|---------------------------------------|---------------------------------------|
|                                        | $^{87}\text{Sr}/^{86}\text{Sr}_s$ | $(^{87}\text{Sr}/^{86}\text{Sr})_i$ | $^{143}\text{Nd}/^{144}\text{Nd}$ | $(^{143}\text{Nd}/^{144}\text{Nd})_i$ | $\epsilon_{\text{Nd}}(t)$ | $T_{\text{DM1}}(\text{Ma})$ | $T_{\text{DM2}}(\text{Ma})$ | $f_{\text{Sm}/\text{Nd}}$ | $^{206}\text{Pb}/^{204}\text{Pb}$ | $^{207}\text{Pb}/^{204}\text{Pb}$ | $^{208}\text{Pb}/^{204}\text{Pb}$ | $(^{206}\text{Pb}/^{204}\text{Pb})_i$ | $(^{207}\text{Pb}/^{204}\text{Pb})_i$ | $(^{208}\text{Pb}/^{204}\text{Pb})_i$ |
| <b>Linglong suite (sample 21JD41)</b>  |                                   |                                     |                                   |                                       |                           |                             |                             |                           |                                   |                                   |                                   |                                       |                                       |                                       |
| 21JD41-1                               | 0.712727                          | 0.712143                            | 0.511752                          | 0.511642                              | -15.42                    | 1957                        | 2196                        | -0.47                     | 17.19                             | 15.46                             | 37.83                             | 17.14                                 | 15.46                                 | 37.72                                 |
| 21JD41-2                               | 0.712724                          | 0.712158                            | 0.511760                          | 0.511638                              | -15.50                    | 2181                        | 2203                        | -0.41                     | 17.19                             | 15.46                             | 37.81                             | 17.14                                 | 15.46                                 | 37.73                                 |
| 21JD41-3                               | 0.711938                          | 0.711332                            | 0.511703                          | 0.511614                              | -15.97                    | 1714                        | 2240                        | -0.57                     | 17.19                             | 15.46                             | 37.84                             | 17.15                                 | 15.46                                 | 37.73                                 |
| 21JD41-4                               | 0.711996                          | 0.711338                            | 0.511694                          | 0.511602                              | -16.20                    | 1765                        | 2259                        | -0.55                     | 17.18                             | 15.47                             | 37.83                             | 17.14                                 | 15.46                                 | 37.74                                 |
| <b>Weideshan suite (sample 21JD37)</b> |                                   |                                     |                                   |                                       |                           |                             |                             |                           |                                   |                                   |                                   |                                       |                                       |                                       |
| 21JD37-1                               | 0.710303                          | 0.709000                            | 0.511700                          | 0.511631                              | -16.69                    | 1780                        | 2265                        | -0.54                     | 17.41                             | 15.52                             | 38.05                             | 17.29                                 | 15.51                                 | 37.72                                 |
| 21JD37-2                               | 0.709895                          | 0.709089                            | 0.511699                          | 0.511637                              | -16.56                    | 1656                        | 2255                        | -0.59                     | 17.45                             | 15.52                             | 38.09                             | 17.27                                 | 15.51                                 | 37.73                                 |
| 21JD37-3                               | 0.709952                          | 0.709126                            | 0.511698                          | 0.511634                              | -16.63                    | 1684                        | 2260                        | -0.58                     | 17.47                             | 15.52                             | 38.15                             | 17.29                                 | 15.52                                 | 37.73                                 |
| 21JD37-4                               | 0.709765                          | 0.709065                            | 0.511696                          | 0.511629                              | -16.73                    | 1740                        | 2268                        | -0.56                     | 17.46                             | 15.52                             | 38.17                             | 17.28                                 | 15.52                                 | 37.69                                 |

**Table S5. Previous published intrusion ages of three major generations of granitoids (Linglong, Guojialing and Weideshan) in the Jiaodong Peninsula<sup>a</sup>.**

| No. | Granitoid suite | Rock Unit   | Method    | Age (Ma) | Error (Ma) | References              |
|-----|-----------------|-------------|-----------|----------|------------|-------------------------|
| 1   | Linglong        | Cangshang   | SHRIMP    | 166      | 4          | Zhang et al. (2003)     |
| 2   |                 | Cangshang   | LA-ICP-MS | 161      | 2          | Zhao et al. (2018)      |
| 3   |                 | Luanjiahe   | LA-ICP-MS | 159      | 2          | Yang et al. (2012)      |
| 4   |                 | Cangshang   | SHRIMP    | 154      | 5          | Zhang et al. (2003)     |
| 5   |                 | Xincheng    | LA-ICP-MS | 161      | 2          | L.Q. Yang et al. (2018) |
| 6   |                 | Wang'ershan | LA-ICP-MS | 161      | 2          | L.Q. Yang et al. (2018) |
| 7   |                 | Linlong     | LA-ICP-MS | 160      | 3          | Ma et al. (2013)        |
| 8   |                 | Wang'ershan | LA-ICP-MS | 159      | 1          | K.F. Yang et al. (2018) |
| 9   |                 | Luanjiahe   | LA-ICP-MS | 159      | 1          | Yang et al. (2012)      |
| 10  |                 | Cuizhao     | SHRIMP    | 158      | 3          | Wang et al. (2011)      |
| 11  |                 | Moshan      | SHRIMP    | 158      | 3          | Miao et al. (1998)      |
| 12  |                 | Linglong    | LA-ICP-MS | 158      | 2          | Ma et al. (2013)        |
| 13  |                 | Linglong    | LA-ICP-MS | 158      | 2          | Ma et al. (2013)        |
| 14  |                 | Linglong    | LA-ICP-MS | 157      | 3          | Ma et al. (2013)        |
| 15  |                 | Wang'ershan | LA-ICP-MS | 149      | 1          | Li et al. (2015)        |
| 16  |                 | Biguo       | LA-ICP-MS | 166      | 4          | Jiang et al. (2012)     |
| 17  |                 | Biguo       | LA-ICP-MS | 166      | 5          | Jiang et al. (2012)     |
| 18  |                 | Linglong    | SIMS      | 166      | 1          | Li et al. (2019)        |
| 19  |                 | Guojiadian  | LA-ICP-MS | 163      | 2          | Jiang et al. (2012)     |
| 20  |                 | Damoqijia   | LA-ICP-MS | 160      | 1          | Chai et al. (2020)      |
| 21  |                 | Taishang    | LA-ICP-MS | 160      | 3          | L.Q. Yang et al. (2018) |
| 22  |                 | Luoshan     | LA-ICP-MS | 160      | 3          | L.Q. Yang et al. (2018) |
| 23  |                 | Cuizhao     | SHRIMP    | 160      | 3          | Miao et al. (1998)      |
| 24  |                 | Xiadian     | LA-ICP-MS | 160      | 1          | Ma et al. (2017)        |
| 25  |                 | Luoshan     | LA-ICP-MS | 159      | 3          | K.F. Yang et al. (2018) |
| 26  |                 | Luanjiahe   | LA-ICP-MS | 158      | 2          | Yang et al. (2012)      |

|    |  |            |           |     |    |                         |
|----|--|------------|-----------|-----|----|-------------------------|
| 27 |  | Luanjiahe  | SIMS      | 158 | 2  | Li et al. (2019)        |
| 28 |  | Taishang   | LA-ICP-MS | 158 | 2  | K.F. Yang et al. (2018) |
| 29 |  | Luanjiahe  | LA-ICP-MS | 157 | 2  | Yang et al. (2012)      |
| 30 |  | Luoshan    | SHRIMP    | 157 | 4  | Miao et al. (1998)      |
| 31 |  | Linglong   | LA-ICP-MS | 156 | 1  | L.Q. Yang et al. (2014) |
| 32 |  | Linlong    | LA-ICP-MS | 156 | 1  | Jiang et al. (2012)     |
| 33 |  | Linglong   | LA-ICP-MS | 156 | 5  | L.Q. Yang et al. (2014) |
| 34 |  | Luanjiahe  | SHRIMP    | 154 | 4  | Miao et al. (1998)      |
| 35 |  | Shuangding | SHRIMP    | 153 | 4  | Miao et al. (1998)      |
| 36 |  | Biguo      | SHRIMP    | 152 | 10 | Miao et al. (1998)      |
| 37 |  | Linlong    | LA-ICP-MS | 150 | 2  | Jiang et al. (2012)     |
| 38 |  | Guojiadian | LA-ICP-MS | 149 | 2  | Jiang et al. (2012)     |
| 39 |  | Linglong   | LA-ICP-MS | 157 | 2  | Zhang et al. (2010)     |
| 40 |  | Yushan     | SHRIMP    | 157 | 2  | Zhang and Zhang (2007)  |
| 41 |  | Hushan     | LA-ICP-MS | 153 | 4  | K.F. Yang et al. (2018) |
| 42 |  | Queshan    | LA-ICP-MS | 156 | 2  | Zhang and Zhang (2007)  |
| 43 |  | Queshan    | LA-ICP-MS | 154 | 1  | Zhang and Zhang (2007)  |
| 44 |  | Duogushan  | LA-ICP-MS | 164 | 2  | Wang (2012)             |
| 45 |  | Duogushan  | SHRIMP    | 161 | 1  | Guo et al. (2005)       |
| 46 |  | Wendeng    | SHRIMP    | 160 | 3  | Guo et al. (2005)       |
| 47 |  | Wuzhuashan | SHRIMP    | 160 | 3  | Hu et al. (2004)        |
| 48 |  | Jiazishan  | LA-ICP-MS | 159 | 2  | Wang (2012)             |
| 49 |  | Jiazishan  | LA-ICP-MS | 159 | 1  | Wang (2012)             |
| 50 |  | Hejiadian  | LA-ICP-MS | 158 | 1  | Wang (2012)             |
| 51 |  | Washan     | SHRIMP    | 153 | 2  | Wang et al. (2011)      |
| 52 |  | Duogushan  | LA-ICP-MS | 153 | 1  | Wang (2012)             |
| 53 |  | Washan     | LA-ICP-MS | 152 | 1  | Zhang and Zhang (2008)  |
| 54 |  | Linglong   | LA-ICP-MS | 160 | 3  | This study              |
| 55 |  | Linglong   | LA-ICP-MS | 159 | 4  | This study              |

|    |            |                   |                |           |     |                        |                  |
|----|------------|-------------------|----------------|-----------|-----|------------------------|------------------|
| 56 |            | Cishan            | LA-ICP-MS      | 158       | 3   | This study             |                  |
| 57 |            | Cishan            | LA-ICP-MS      | 153       | 3   | This study             |                  |
| 58 | Guojialing | Sanshandao        | LA-ICP-MS      | 130       | 1   | Zhao et al. (2018)     |                  |
| 59 |            | Sanshandao        | LA-ICP-MS      | 129       | 1   | Yang et al. (2012)     |                  |
| 60 |            | Sanshandao        | SHRIMP         | 128       | 2   | Guan et al. (1998)     |                  |
| 61 |            | Sanshandao        | LA-ICP-MS      | 127       | 2   | Wang et al. (2018)     |                  |
| 62 |            | Xinli             | LA-ICP-MS      | 130       | 0   | Zhao et al. (2018)     |                  |
| 63 |            | Cangshang         | LA-ICP-MS      | 131       | 1   | Wang et al. (2018)     |                  |
| 64 |            | Xincheng          | LA-ICP-MS      | 132       | 1   | Wang et al. (2014)     |                  |
| 65 |            | Shangzhuang       | LA-ICP-MS      | 132       | 1   | Deng et al. (2015)     |                  |
| 66 |            | Shangzhuang       | LA-ICP-MS      | 130       | 1   | Cai et al. (2018)      |                  |
| 67 |            | Xincheng          | LA-ICP-MS      | 129       | 1   | Wang et al. (2014)     |                  |
| 68 |            | Shangzhuang       | LA-ICP-MS      | 129       | 1   | Yang et al. (2012)     |                  |
| 69 |            | Xincheng          | LA-ICP-MS      | 128       | 1   | Wang et al. (2014)     |                  |
| 70 |            | Xincheng          | LA-ICP-MS      | 128       | 1   | Wang et al. (2014)     |                  |
| 71 |            | Xincheng          | LA-ICP-MS      | 128       | 1   | Wang et al. (2014)     |                  |
| 72 |            | Congjia           | SHRIMP         | 128       | 6   | Guan et al. (1998)     |                  |
| 73 |            | Congjia           | SHRIMP         | 127       | 1   | Geng et al. (2016)     |                  |
| 74 |            | Xincheng          | LA-ICP-MS      | 127       | 1   | Deng et al. (2015)     |                  |
| 75 |            | Xincheng          | LA-ICP-MS      | 126       | 1   | Wang et al. (2014)     |                  |
| 76 |            | Xincheng          | LA-ICP-MS      | 126       | 1   | Zhang et al. (2019)    |                  |
| 77 |            | Shangzhuang       | SHRIMP         | 126       | 2   | Guan et al. (1998)     |                  |
| 78 |            | Guojialing        | LA-ICP-MS      | 133       | 3   | J. Zhang et al. (2010) |                  |
| 79 |            | Damoqujia deposit | LA-ICP-MS      | 130       | 1   | Chai et al. (2020)     |                  |
| 80 |            | Guojialing        | SHRIMP         | 130       | 3   | Guan et al. (1998)     |                  |
| 81 |            | Guojialing        | SHRIMP         | 129       | 3   | Guan et al. (1998)     |                  |
| 82 |            | Guojialing        | LA-ICP-MS      | 130       | 2   | Li et al. (2019)       |                  |
| 83 |            | Guojialing        | SIMS           | 128       | 1   | Li et al. (2019)       |                  |
| 84 |            | Weideshan         | Gushan (Nansu) | LA-ICP-MS | 120 | 1                      | Li et al. (2012) |

|            |  |                |           |     |   |                         |
|------------|--|----------------|-----------|-----|---|-------------------------|
| <b>85</b>  |  | Gushan (Nansu) | LA-ICP-MS | 119 | 1 | Li et al. (2012)        |
| <b>86</b>  |  | Gushan (Nansu) | LA-ICP-MS | 119 | 1 | Li et al. (2012)        |
| <b>87</b>  |  | Nansu          | LA-ICP-MS | 111 | 2 | Song et al. (2020b)     |
| <b>88</b>  |  | Nansu          | LA-ICP-MS | 121 | 2 | This study              |
| <b>89</b>  |  | Aishan         | LA-ICP-MS | 111 | 2 | Zhang et al. (2010)     |
| <b>90</b>  |  | Aishan         | SIMS      | 118 | 1 | Li et al. (2019)        |
| <b>91</b>  |  | Aishan         | SIMS      | 118 | 1 | Li et al. (2019)        |
| <b>92</b>  |  | Aishan         | LA-ICP-MS | 117 | 1 | Li et al. (2019)        |
| <b>93</b>  |  | Aishan         | SIMS      | 115 | 1 | Li et al. (2019)        |
| <b>94</b>  |  | Aishan         | LA-ICP-MS | 116 | 2 | Goss et al. (2010)      |
| <b>95</b>  |  | Aishan         | LA-ICP-MS | 114 | 1 | Song et al. (2020b)     |
| <b>96</b>  |  | Aishan         | LA-ICP-MS | 118 | 1 | Song et al. (2020b)     |
| <b>97</b>  |  | Aishan         | LA-ICP-MS | 118 | 1 | This study              |
| <b>98</b>  |  | Yashan         | SHRIMP    | 118 | 3 | Zhang and Zhang. (2007) |
| <b>99</b>  |  | Yashan         | LA-ICP-MS | 116 | 1 | Goss et al. (2010)      |
| <b>100</b> |  | Yashan         | LA-ICP-MS | 114 | 0 | Zhao et al. (2018)      |
| <b>101</b> |  | Yashan         | LA-ICP-MS | 113 | 2 | Goss et al. (2010)      |
| <b>102</b> |  | Yashan         | LA-ICP-MS | 120 | 1 | This study              |
| <b>103</b> |  | Sanfoshan      | LA-ICP-MS | 120 | 1 | Li et al. (2018)        |
| <b>104</b> |  | Sanfoshan      | LA-ICP-MS | 118 | 1 | Goss et al. (2010)      |
| <b>105</b> |  | Taiboding      | LA-ICP-MS | 118 | 3 | Tang et al. (2014)      |
| <b>106</b> |  | Sanfoshan      | LA-ICP-MS | 117 | 1 | Goss et al. (2010)      |
| <b>107</b> |  | Sanfoshan      | SHRIMP    | 116 | 3 | Zhang et al. (2010)     |
| <b>108</b> |  | Sanfoshan      | LA-ICP-MS | 116 | 2 | Li et al. (2018)        |
| <b>109</b> |  | Liudusi        | LA-ICP-MS | 115 | 2 | Tang et al. (2014)      |
| <b>110</b> |  | Haiyang        | SHRIMP    | 115 | 2 | Zhang and Zhang. (2007) |
| <b>111</b> |  | Liudusi        | TIMS      | 115 | 1 | Guo et al. (2005)       |
| <b>112</b> |  | Weideshan      | LA-ICP-MS | 114 | 2 | Ding et al. (2013)      |
| <b>113</b> |  | Sanfoshan      | LA-ICP-MS | 114 | 3 | Zhang et al. (2010)     |

|                                                           |  |              |           |     |   |                         |
|-----------------------------------------------------------|--|--------------|-----------|-----|---|-------------------------|
| <b>114</b>                                                |  | Weideshan    | LA-ICP-MS | 114 | 1 | Zhao et al. (2018)      |
| <b>115</b>                                                |  | Taiboding    | TIMS      | 114 | 1 | Guo et al. (2005)       |
| <b>116</b>                                                |  | Yuangezhuang | SHRIMP    | 113 | 3 | Zhang and Zhang. (2007) |
| <b>117</b>                                                |  | Weideshan    | LA-ICP-MS | 113 | 2 | Ding et al. (2013)      |
| <b>118</b>                                                |  | Sanfoshan    | SHRIMP    | 113 | 1 | Guo et al. (2005)       |
| <b>119</b>                                                |  | Liudusi      | LA-ICP-MS | 113 | 2 | Hu (2006)               |
| <b>120</b>                                                |  | Sanfoshan    | LA-ICP-MS | 111 | 2 | Li et al. (2018)        |
| <b>121</b>                                                |  | Sanfoshan    | LA-ICP-MS | 111 | 3 | Hu (2006)               |
| <b>122</b>                                                |  | Xiamashan    | LA-ICP-MS | 111 | 2 | Hu (2006)               |
| <b>123</b>                                                |  | Weideshan    | TIMS      | 108 | 2 | Guo et al. (2005)       |
| <b>124</b>                                                |  | Weideshan    | LA-ICP-MS | 112 | 1 | Song et al. (2020b)     |
| <b>125</b>                                                |  | Weideshan    | LA-ICP-MS | 111 | 1 | Song et al. (2020b)     |
| <b>126</b>                                                |  | Weideshan    | LA-ICP-MS | 118 | 2 | This study              |
| <b><sup>a</sup> Modified from L. Zhang et al. (2020).</b> |  |              |           |     |   |                         |
